# Supplementary material for: A phage-encoded RNA-binding protein inhibits the antiviral activity of a toxin–antitoxin system
Source: PubMed Central journal article supplement (PMC10853763; doi:10.1093/nar/gkad1207), 2023-12-20
Supplement: gkad1207_supplemental_file.pdf [file gkad1207_supplemental_file.pdf]

**Supplemental Files for:**

**A phage-encoded RNA-binding protein inhibits the antiviral activity of a toxin-antitoxin system**

Chantal K. Guegler, Gabriella I.C. Teodoro, Sriram Srikant, Keerthana Chetlapalli, Christopher R. Doering, Dia A. Ghose, Michael T. Laub

## Supplemental Figure and Table Legends

### Figure S1. TifA and ToxN homologs are present in T4-like phage and bacterial genomes, respectively

(A) Protein homology tree based on primary sequence alignments of 57 TifA homologs, with the TifA homologs used for the screen in Figure 1C indicated. Note that TifA<sub>T2</sub> and TifA<sub>T6</sub> differ by only a few amino acids, and therefore only TifA<sub>T6</sub> was included in the tree.

(B) Multiple sequence alignment of ToxN homologs used for the screen in Figure 1C. Degree of sequence similarity is highlighted in gray/black.

### Figure S2. Rescue of ToxN homolog overexpression by co-expression of various TifA homologs

(A-F) Cell spotting assays of *E. coli* MG1655 transformed with pBAD33-*toxN* and pEXT20-*tifA* used to assemble Figure 1C. To induce ToxN and TifA, cells were serially-diluted 10-fold and spotted on plates containing both IPTG and arabinose. To induce only ToxN, cells were spotted on plates containing only arabinose. A toxin was counted as rescued by a TifA homolog if, across multiple replicates, its colony-forming efficiency and/or colony size was increased on +arabinose, +IPTG (ToxN and TifA induced) plates relative to +arabinose (ToxN induced) plates. Bacterial species from which ToxN and TenpN homologs were cloned: *Escherichia coli* (Ec); *Pectobacterium atrosepticum* (Pa); *Klebsiella pneumoniae* (Kp); *Shigella sonnei* (Ss); *Vibrio kanaloae* (Vk); *Serratia* sp. SRS-8-S-2018 (Ser).

(G) Western blot of two FLAG-tagged TifA homologs (TifA<sub>vB\_PatP\_CB4</sub> and TifA<sub>vB\_EcoM\_005</sub>) following production from an IPTG-inducible promoter for ~6.5 hours in liquid culture. RpoA is included as a loading control.

### Figure S3. AlphaFold predictions of the TifA and ToxN-TifA structures

(A) Per-residue confidence of five AlphaFold predictions for the structure of TifA<sub>T4</sub>. The top-ranked prediction was used for downstream analyses.

(B) Per-residue confidence of five AlphaFold predictions for the structure of TifA<sub>RB69</sub>. The top-ranked prediction was used for downstream analyses.

(C) Overlay of the crystal structure of *P. atrosepticum* ToxN (ToxN<sub>Pa</sub>) and the predicted structure of *E. coli* ToxN (ToxN<sub>Ec</sub>) in complex with TifA<sub>T4</sub>. The positions of ToxN residues K111, Y115, and L118 in the model of ToxN<sub>Ec</sub> are shown in magenta.

(D) Overlay of the crystal structure of *P. atrosepticum* ToxN (ToxN<sub>Pa</sub>) and the predicted structure of *E. coli* ToxN (ToxN<sub>Ec</sub>) in complex with TifA<sub>RB69</sub>.

(E) Space-filling AlphaFold model for the ToxN-TifA<sub>RB69</sub> complex, with TifA residues predicted to interact with ToxN indicated.

(F) Per-residue confidence of five AlphaFold predictions for the structure of ToxN in complex with TifA<sub>T4</sub>. The top-ranked prediction was used for downstream analyses.

(G) Per-residue confidence of five AlphaFold predictions for the structure of ToxN in complex with TifA<sub>RB69</sub>. The top-ranked prediction was used for downstream analyses.

(H) Heat map showing predicted aligned error (PAE) for five AlphaFold-predicted models for the ToxN-TifA<sub>T4</sub> complex; a low PAE value indicates that AlphaFold predicts well-defined relative positions and orientations for the two domains or proteins. The highest-ranking model was used for analysis in the manuscript.

(I) Heat map showing predicted aligned error (PAE) for five AlphaFold-predicted models for the ToxN-TifA<sub>RB69</sub> complex. The highest-ranking model was used for analysis in the manuscript.

#### **Figure S4. Use of a *tab* screen to isolate TifA-resistant ToxN mutants**

(A) Example selection plates for +*toxIN*, +TifA<sub>RB69</sub> cells during *tab* selection. Serial 10-fold dilutions of T4 were mixed with cells expressing TifA from an inducible promoter and a library of *toxIN* variants (or wild-type *toxIN* as a control). Microcolonies in the *toxIN* library that arose at dilutions of T4 in which the control cells (+*toxIN* wild-type, top) no longer grew (both dilutions shown) were isolated and Sanger sequenced.

(B) Growth curves for MG1655 cells harboring pBR322-*toxIN* (wild type or mutant), with calculated doubling times indicated in brackets.

**Figure S5. ToxN forms a high molecular weight RNA-protein complex when it is co-purified with TifA**

(A) Serial dilutions of *E. coli* cells expressing *toxN* (wild-type or chitin-binding domain-tagged) and *tifARB69* (wild-type or FLAG-tagged). Plasmids harboring *toxN* and *tifA* under arabinose- and IPTG-inducible promoters, respectively, were transformed into *E. coli* MG1655, and protein production was induced with the addition of arabinose and IPTG.

(B) (*top*) Size-exclusion chromatogram of purified ToxN-TifARB69-FLAG run on a Superose 6 Increase 10/300 GL column with collected fractions indicated. (*bottom*) Anti-FLAG Western blot probing for TifARB69-FLAG in various FPLC fractions, indicating that TifARB69 localizes in the high molecular weight peak.

**Figure S6. TifA has a conserved nucleic acid-binding domain**

(A) Alignment of 57 TifA homologs, with the position of F41 in TifAT4, the conserved PT motif, and the cluster of basic residues indicated. Degree of sequence similarity is highlighted in gray/black.

(B) Denaturing 6% urea-PAGE gel resolving nucleic acid that copurifies with TifARB69-MBP-His6 in Ni-NTA resin purification; nucleic acid was treated with Turbo DNase, RNase 1f, or neither before running on the gel.

(C) Serial dilutions of *E. coli* cells expressing *tifARB69*-MBP-His6 with and without co-expression of *toxN*. Plasmids harboring *toxN* and *tifA* under arabinose- and IPTG-inducible promoters, respectively, were transformed into *E. coli* MG1655, and protein production was induced with the addition of arabinose and IPTG.

(D) Results of fluorescence polarization assays measuring the binding affinity of TifARB69 incubated to several fluorescently labeled RNA, ssDNA, and dsDNA species (lengths and sources of sequences indicated). See Table S5 for sequences of nucleic acid substrates tested.

(E) Size-exclusion chromatogram of purified TifA<sub>RB69</sub> (P53A T54A)-MBP-His<sub>6</sub> run on a Superose 6 Increase 10/300 GL column.

(F) SDS-PAGE of purified TifA<sub>RB69</sub>-MBP-His<sub>6</sub> variants following purification of proteins from cell lysate through Ni-NTA resin.

**Figure S7. Characterization of RNAs co-purifying with ToxN-TifA.**

(A) Size-exclusion chromatogram of purified ToxIN run on a Superose 6 Increase 10/300 GL column.

(B) (*top*) Size-exclusion chromatogram of purified ToxN, *toxI*, and TifA<sub>RB69</sub>-FLAG run on a Superose 6 Increase 10/300 GL column, with collected fractions indicated. (*bottom*) Anti-FLAG Western blot probing for TifA<sub>RB69</sub>-FLAG in various FPLC fractions, indicating that TifA<sub>RB69</sub> localizes in the high molecular weight peak but does not colocalize with the ToxIN complex.

(C) Scatter plots comparing the summed RNA-seq counts (log<sub>2</sub> rpm) for individual genes in the *E. coli* BL21 genome in each set of two biological replicate samples (TifA WT sample eluent and lysate and TifA mutant sample eluent and lysate).

(D) Scatter plot comparing the mean summed RNA-seq counts (log<sub>2</sub> rpm) for individual genes in TifA WT sample whole cell lysate and chitin resin eluent (two biological replicates each). Genes with rpm values greater than or equal to 3 in all sequenced libraries (lysates and eluents) are shown.

(E) Scatter plot comparing the mean summed RNA-seq counts (log<sub>2</sub> rpm) for individual genes in TifA mutant sample whole cell lysate and chitin resin eluent (two biological replicates each). Genes with rpm values greater than or equal to 3 in all sequenced libraries (lysates and eluents) are shown.

(F) Western blot of ToxN-His<sub>6</sub> or ToxN(K55A)-His<sub>6</sub> in cell lysate and following co-immunoprecipitation with TifA<sub>T4</sub>-FLAG (wild-type) in T4-infected cells producing TifA<sub>T4</sub> and ToxN.



**A**

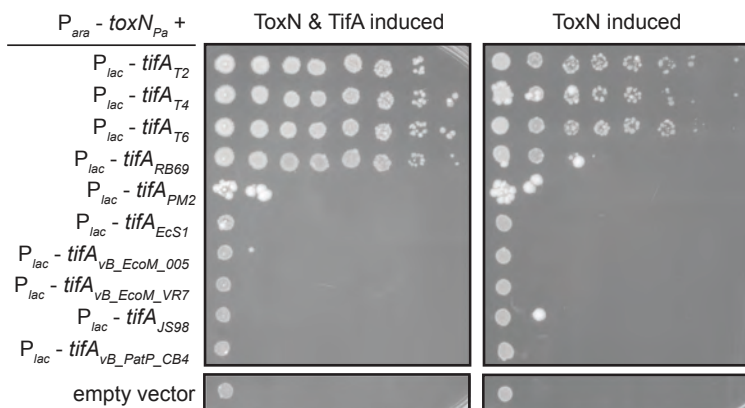

**B**

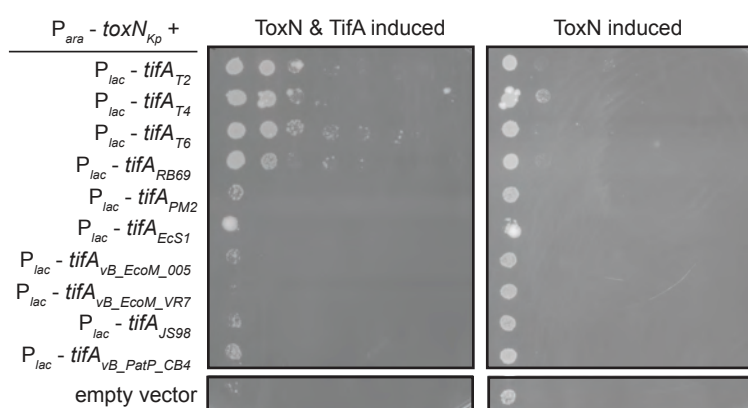

**C**

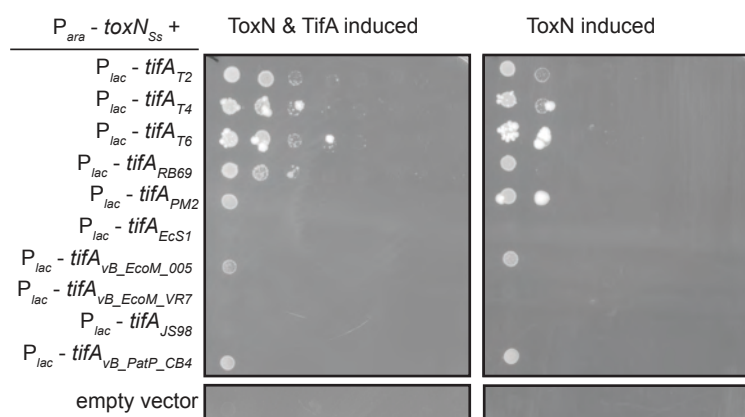

**D**

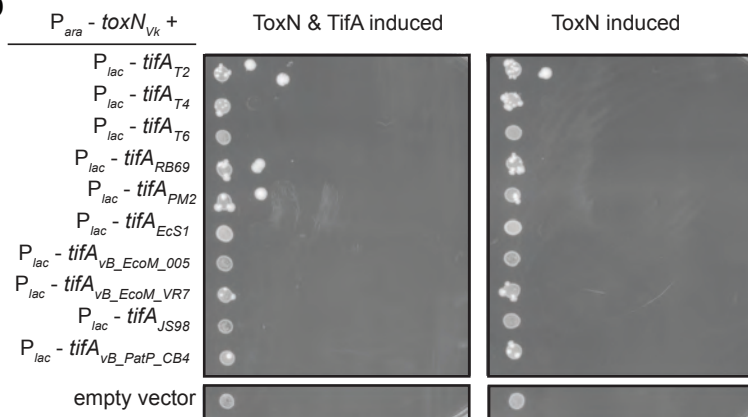

**E**

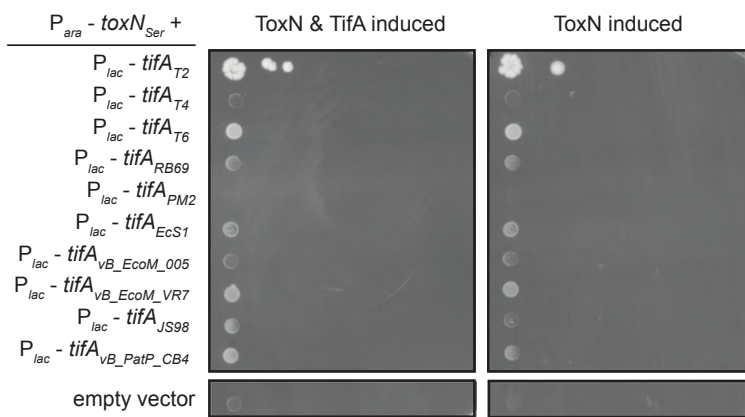

**F**

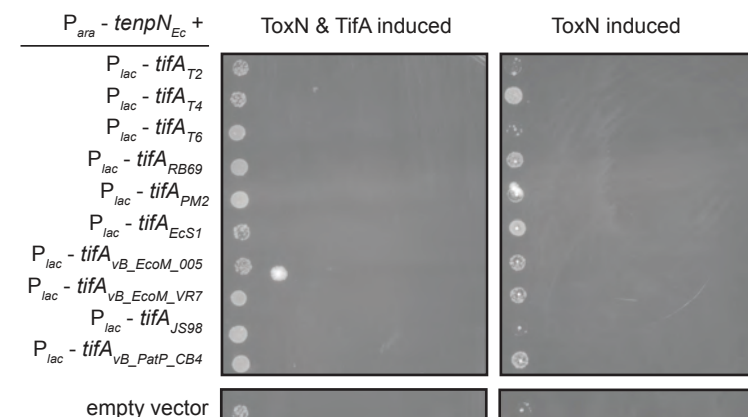

**G**

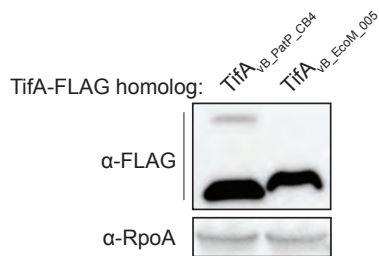

A

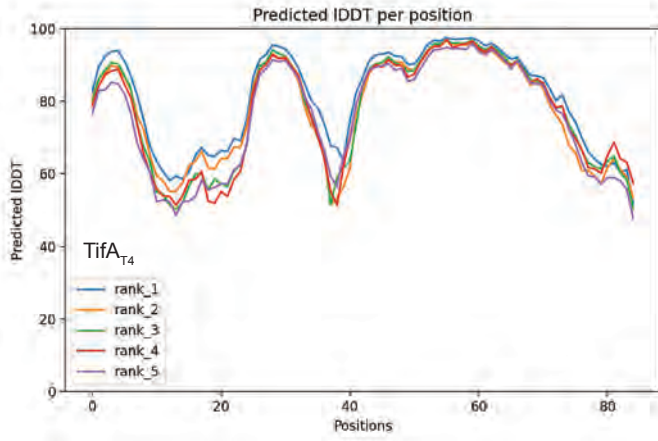

B

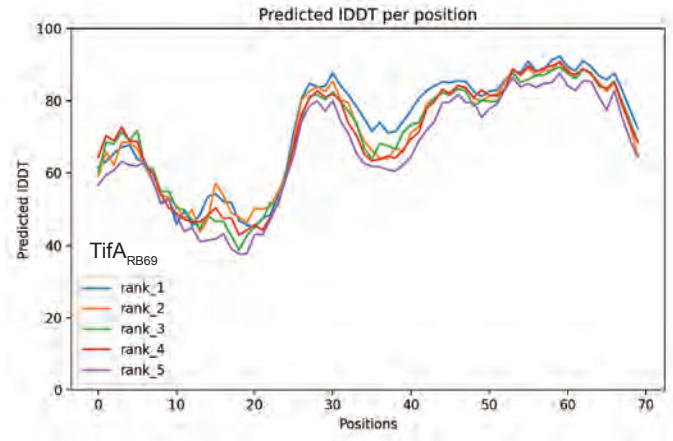

C

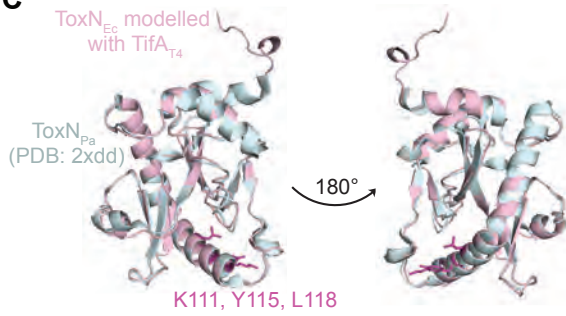

D

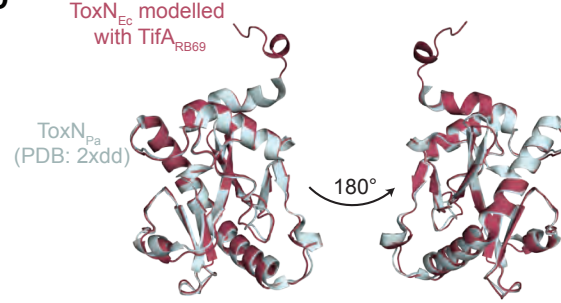

E

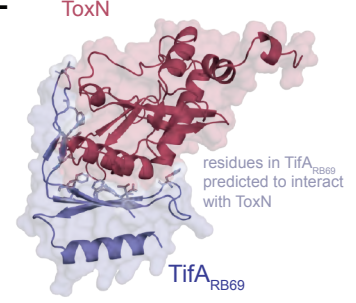

F

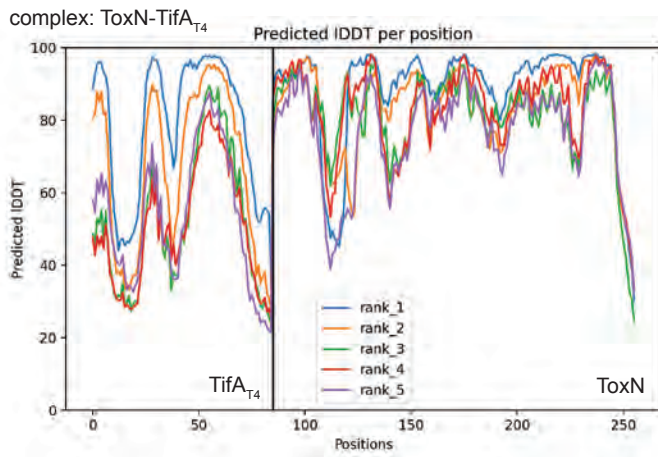

G

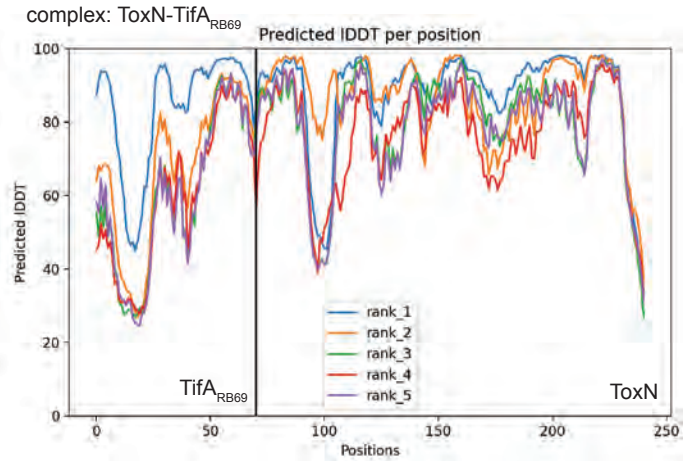

H

ToxN-TifA<sub>T4</sub>: A = TifA, B = ToxN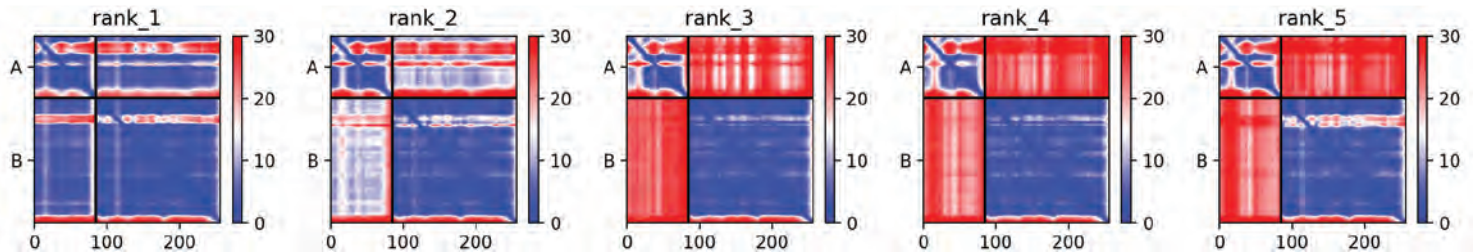

I

ToxN-TifA<sub>RB69</sub>: A = TifA, B = ToxN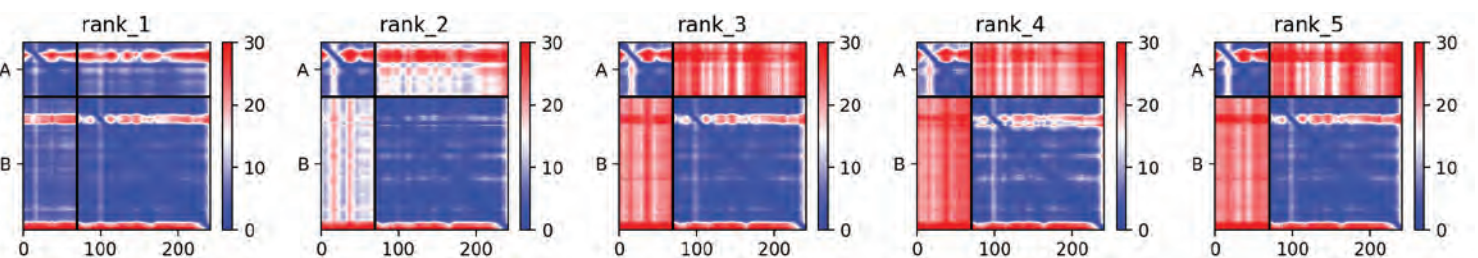



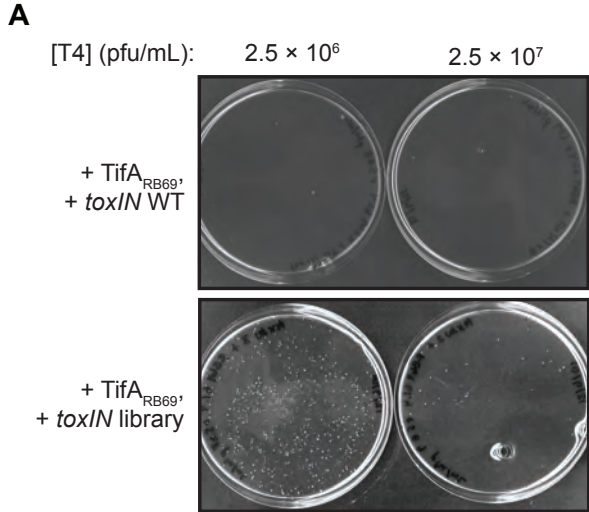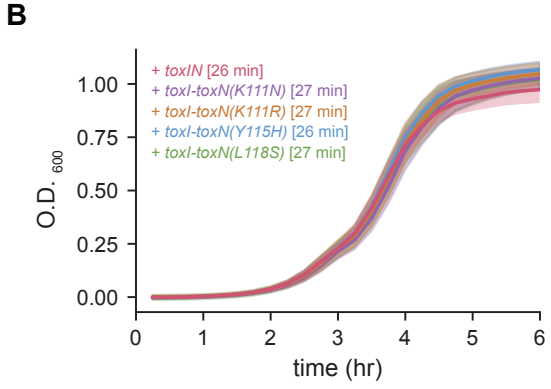

**A**

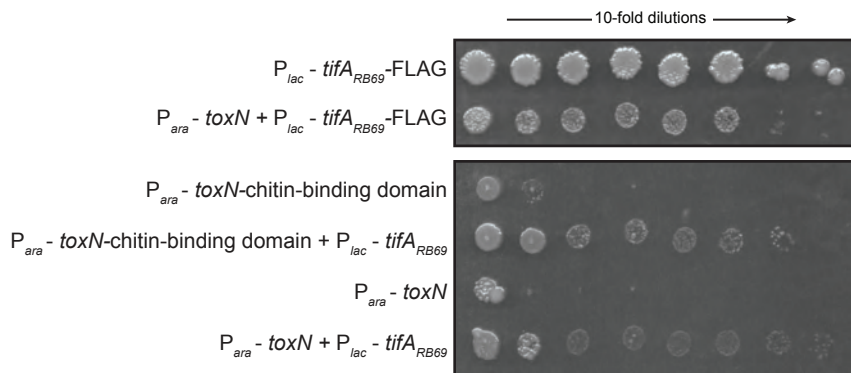

**B**

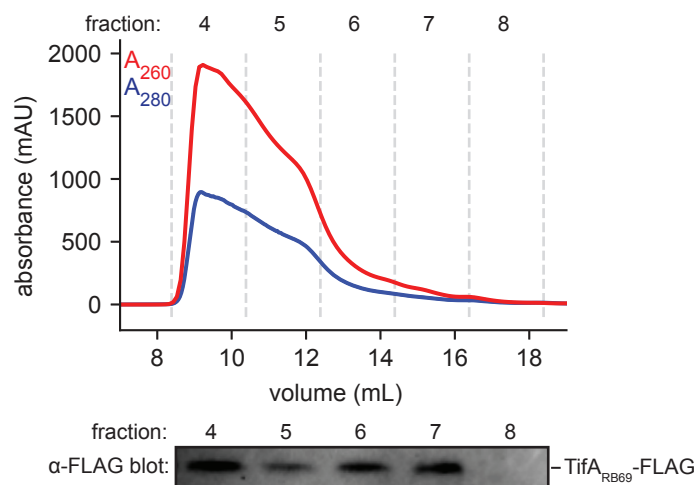



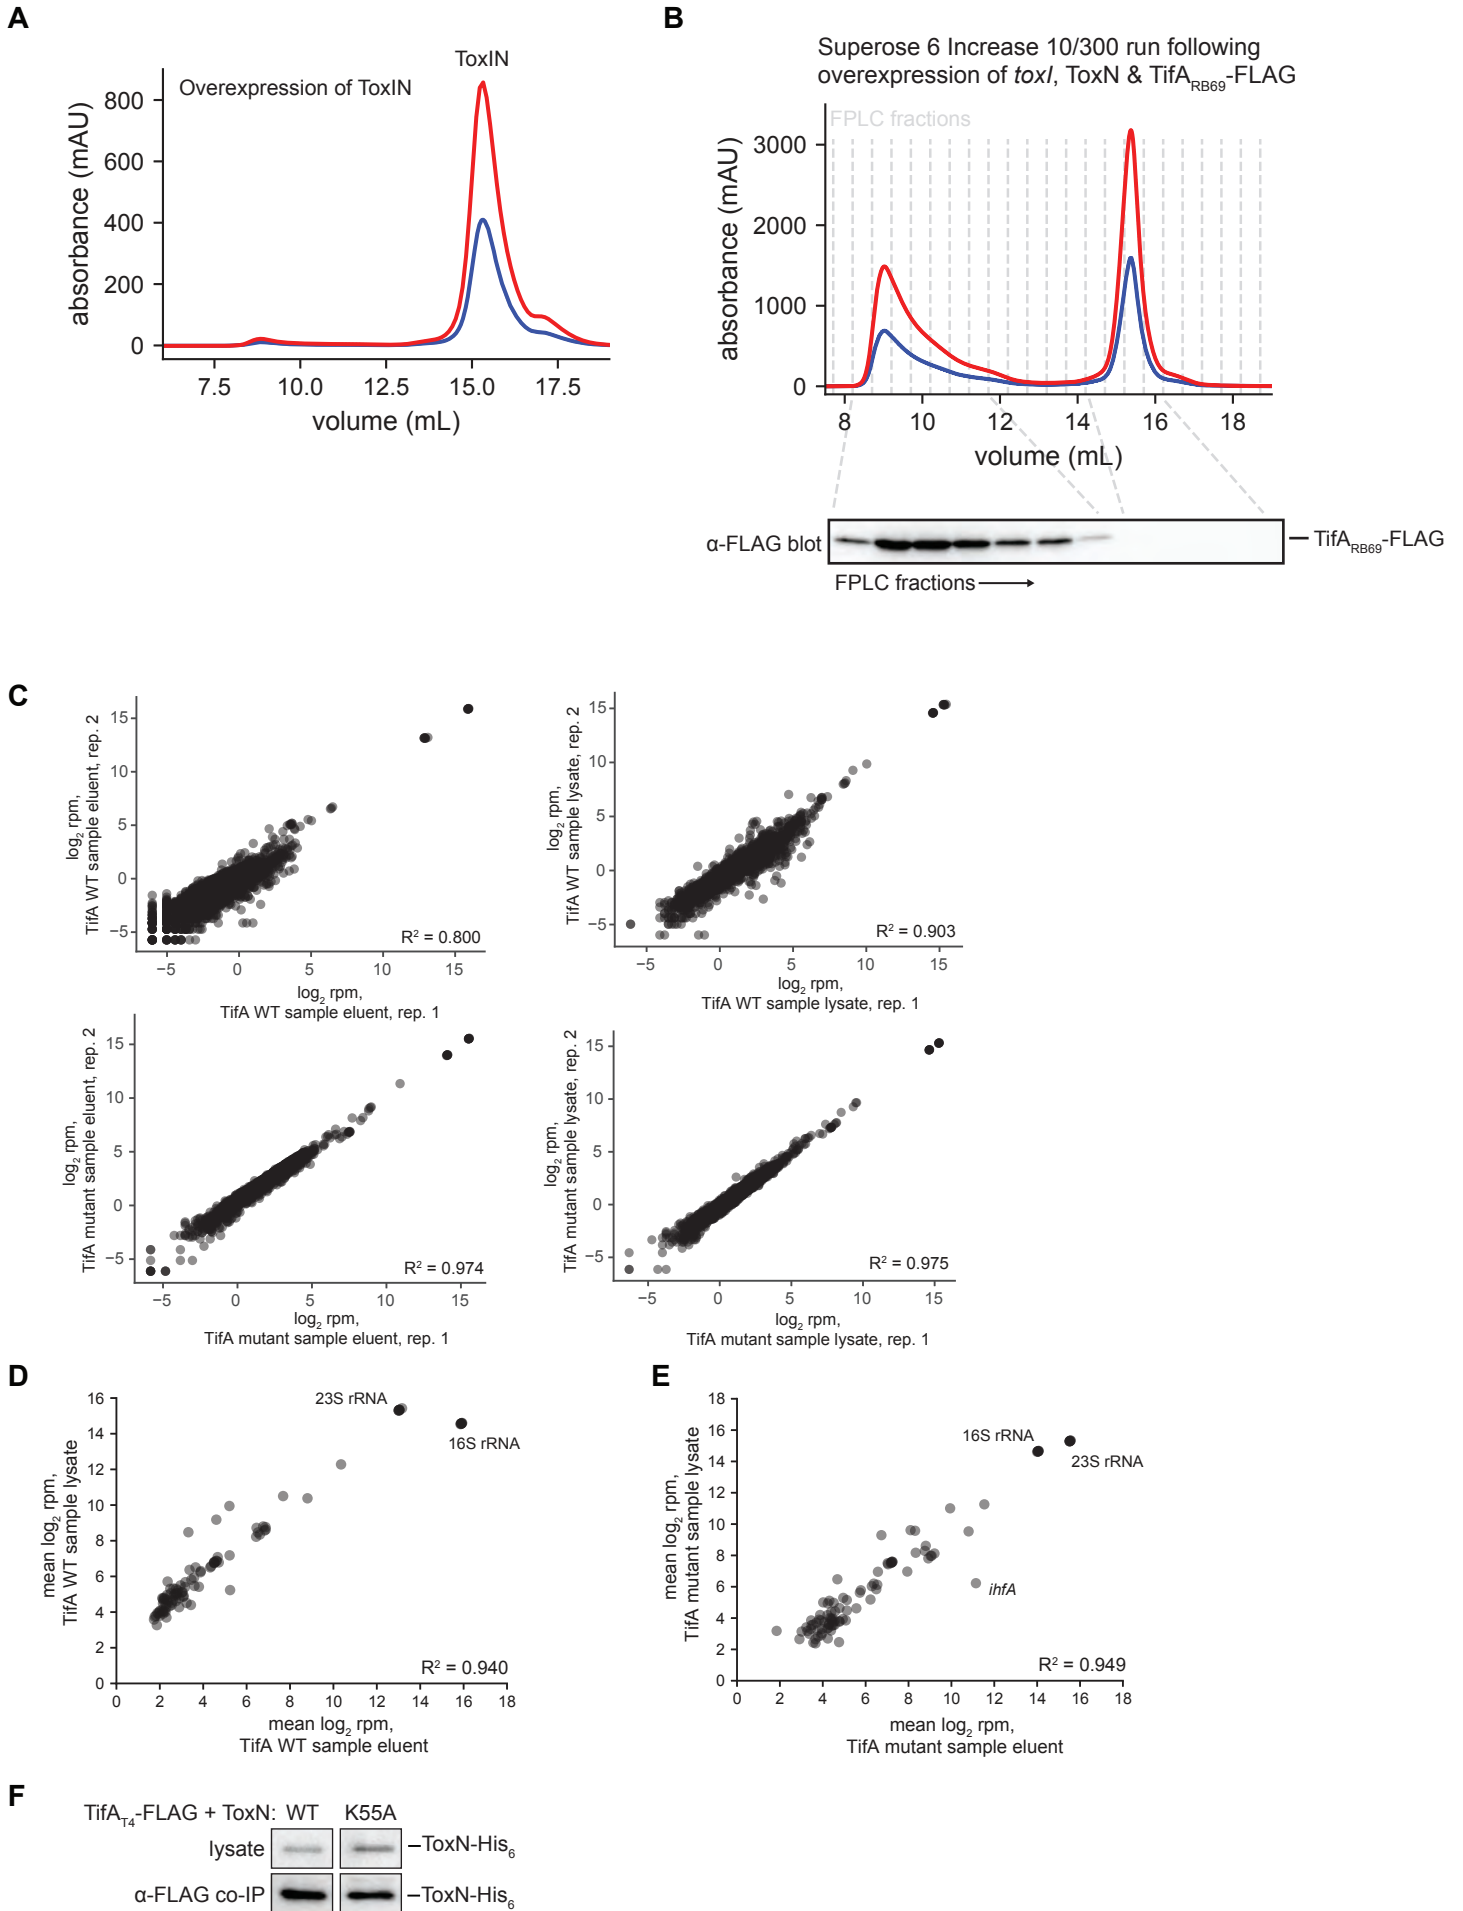

**Table S1. Reagents, Assays, and Software**

Critical commercial reagents, assays, and software used in this study.

**Table S2. Protein sequences for ToxN, TenpN, and TifA homologs**

Protein sequences for ToxN, TenpN, and TifA homologs used for the neutralization screen in Figure 1.

**Table. S3. Strains**

*E. coli* strains generated and used in this study.

**Table S4. Plasmids**

Plasmids generated and used in this study.

**Table S5. Primers and Oligos**

DNA and RNA oligos used in this study.

**Table S6. G-blocks**

G-block sequences used to clone ToxN and TifA homologs used for the neutralization screen in Figure 1.

**Table S1. Reagents, Assays and Software**

| <b>Antibodies</b>                                                                 |                                                                          |                 |
|-----------------------------------------------------------------------------------|--------------------------------------------------------------------------|-----------------|
| 6x-His epitope tag antibody (rabbit monoclonal)                                   | Abcam                                                                    | Cat #: AB200537 |
| DYKDDDDK epitope tag antibody (rabbit monoclonal)                                 | Cell Signaling Technology                                                | Cat #: 14793    |
| Purified anti- <i>E. coli</i> RNA Polymerase $\alpha$ antibody (mouse monoclonal) | BioLegend                                                                | Cat #: 663104   |
| Anti-FLAG M2 antibody (mouse monoclonal)                                          | Sigma                                                                    | Cat #: F1804    |
| Anti-FLAG M2 magnetic beads (mouse monoclonal)                                    | Sigma                                                                    | Cat #: 14793    |
| Goat anti-rabbit IgG (H+L) secondary antibody, HRP (goat polyclonal)              | ThermoFisher Scientific                                                  | Ca t#: 32460    |
| <b>Bacterial and Virus Strains</b>                                                |                                                                          |                 |
| For a complete list of bacterial strains used in this study, see Table S3.        |                                                                          |                 |
| <i>E. coli</i> MG1655                                                             |                                                                          | ML6             |
| <i>E. coli</i> DH5 $\alpha$                                                       | Invitrogen                                                               | Cat #: EC0112   |
| <i>E. coli</i> TOP10                                                              | Invitrogen                                                               | Cat #: C404010  |
| T7 Express Competent <i>E. coli</i> (High Efficiency)                             | NEB                                                                      | Cat #: C2566    |
| T4D                                                                               | Gift from R. Young                                                       | phML-31         |
| RB69                                                                              | Félix d'Hérelle Reference Center for Bacterial Viruses, Université Laval | phML-39         |

|                                                                |                              |                    |
|----------------------------------------------------------------|------------------------------|--------------------|
| T4 evo 3                                                       | Srikant <i>et al.</i> , 2022 | N/A                |
| T4 evo 2 ( <i>tifA F41S</i> )                                  | Srikant <i>et al.</i> , 2022 | N/A                |
| Thu1/R2                                                        | This study                   | N/A                |
| <b>Chemicals, Peptides, and Recombinant Proteins</b>           |                              |                    |
| Carbenicillin                                                  | Gold Bio                     | Cat #: C-103       |
| Chloramphenicol                                                | Millipore Sigma              | Cat #: C0378       |
| Elution Buffer (EB)                                            | QIAGEN                       | Cat #: 19086       |
| GlycoBlue Coprecipitant (15 mg/mL)                             | Thermo Fisher                | Cat #: AM9515      |
| Kapa Biosystems HiFi Hotstart Readymix                         | Fisher Scientific            | Cat #: NC0465187   |
| Methanol                                                       | Millipore Sigma              | Cat #: 179337      |
| PEG 8000                                                       | Hampton Research             | Cat #: HR2-515     |
| Phenol-chloroform-isoamyl alcohol (25:24:1)                    | Millipore Sigma              | Cat #: 77617-100ML |
| Second Strand Buffer                                           | Thermo Fisher                | Cat #: 10812014    |
| SUPERase•In RNase Inhibitor (20 U/mL)                          | Thermo Fisher                | Cat #: AM2694      |
| SuperScript III Reverse Transcriptase                          | Thermo Fisher                | Cat #: 18080044    |
| SYBR Gold Nucleic Acid Gel Stain (10,000X Concentrate in DMSO) | Thermo Fisher                | Cat #: S11494      |
| HpaI                                                           | NEB                          | Cat #: R0105       |
| T4 DNA Ligase Reaction Buffer                                  | NEB                          | Cat #: B0202       |
| T4 DNA Ligase                                                  | NEB                          | Cat #: M0202       |

|                                                                     |                   |                      |
|---------------------------------------------------------------------|-------------------|----------------------|
| T4 Polynucleotide Kinase                                            | NEB               | Cat #: M0201         |
| T4 DNA Polymerase                                                   | NEB               | Cat #: M0203         |
| Isopropyl-D-1-thiogalactopyranoside                                 | Goldbio           | Cat #: I2481C        |
| L-arabinose                                                         | Fisher Scientific | Cat #: AC365185000   |
| Anhydrotetracycline hydrochloride                                   | Sigma-Aldrich     | Cat #: 37919-100MG-R |
| 2x Gibson Assembly Master Mix                                       | NEB               | Cat #: E2611         |
| 2x Novex TBE-Urea sample buffer                                     | Invitrogen        | Cat #: LC6876        |
| Phenol solution saturated with 0.1 M citrate buffer, pH = 4.3 ± 0.2 | Sigma-Aldrich     | Cat #: P4682         |
| Acid-Phenol:Chloroform, pH 4.5 (with IAA, 125:24:1)                 | Thermo Fisher     | Cat #: AM9720        |
| Sodium Acetate (3 M), pH 5.5, RNase-free                            | Thermo Fisher     | Cat #: AM9740        |
| DEPC-treated water                                                  | Invitrogen        | Cat #: AM9906        |
| NdeI                                                                | NEB               | Cat #: R0111         |
| SapI                                                                | NEB               | Cat #: R0569         |
| AvrII                                                               | NEB               | Cat #: R0174         |
| SacI-HF                                                             | NEB               | Cat #: R3156L        |
| Sall-HF                                                             | NEB               | Cat #: R3138L        |
| 10x CutSmart buffer                                                 | NEB               | Cat #: B7204S        |
| SIGMAFAST protease inhibitor cocktail tablets, EDTA-free            | Sigma-Aldrich     | Cat #: S8830         |



|                                                        |               |                     |
|--------------------------------------------------------|---------------|---------------------|
| Chitin resin                                           | NEB           | Cat #: S6651S       |
| UltraPure BSA (50 mg/mL)                               | Invitrogen    | Cat #: AM2616       |
| <b>Critical Commercial Assays, Kits, and Equipment</b> |               |                     |
| SuperSignal West Femto Maximum Sensitivity Substrate   | Thermo Fisher | Cat #: 34095        |
| ZR Plasmid Miniprep - Classic                          | Zymo          | Cat #: D4016        |
| Zymoclean Gel DNA Recovery Kit                         | Zymo          | Cat #: D4001        |
| Low Range ssRNA Ladder                                 | NEB           | Cat #: N0364S       |
| Chameleon Duo Pre-Stained Protein Ladder               | Licor         | Cat #: 928-60000    |
| Chitin resin                                           | NEB           | Cat #: S6651S       |
| NEBNext Ultra II RNA Library Prep Kit                  | NEB           | Cat #: E7770        |
| Novex 6% TBE-Urea gel                                  | Invitrogen    | Cat #: EC6865BOX    |
| 4-20% Mini-PROTEAN TGX gels                            | Biorad        | Cat #: 4561093      |
| Superose 6 Increase 10/300 GL size exclusion column    | Cytiva        | Cat #: GE29-0915-96 |
| <b>Deposited Data</b>                                  |               |                     |
| RNA-Sequencing                                         | This study    | GSE234211           |
| <b>Recombinant DNA</b>                                 |               |                     |

For a complete list of plasmids and G-blocks generated for this study, see Table S4.

### Oligonucleotides

For a complete list of oligonucleotides used for this study, see Table S5.

### Software and Algorithms

|                    |                             |                                                                                                                                                                                               |
|--------------------|-----------------------------|-----------------------------------------------------------------------------------------------------------------------------------------------------------------------------------------------|
| ImageJ (v1.48)     | NIH                         | <a href="https://imagej.nih.gov/ij/">https://imagej.nih.gov/ij/</a>                                                                                                                           |
| bowtie2 (v2.1.0)   | Langmead and Salzberg, 2012 | <a href="http://bowtie-bio.sourceforge.net/bowtie2/index.shtml">http://bowtie-bio.sourceforge.net/bowtie2/index.shtml</a>                                                                     |
| pysam (v0.9.1.4)   | N/A                         | <a href="https://github.com/pysam-developers/pysam">https://github.com/pysam-developers/pysam</a>                                                                                             |
| samtools (v0.1.19) | Li et al., 2009             | <a href="http://samtools.sourceforge.net/">http://samtools.sourceforge.net /</a>                                                                                                              |
| numpy (v1.13.1)    | N/A                         | <a href="https://github.com/numpy/numpy">https://github.com/numpy/numpy</a>                                                                                                                   |
| biopython (v1.65)  | N/A                         | <a href="https://github.com/biopython/biopython">https://github.com/biopython/biopython</a>                                                                                                   |
| scipy (v0.18.1)    | N/A                         | <a href="https://github.com/scipy/scipy">https://github.com/scipy/scipy</a>                                                                                                                   |
| jupyter notebook   | N/A                         | <a href="https://github.com/jupyter">https://github.com/jupyter</a>                                                                                                                           |
| AlphaFold2         | Jumper et al., 2021         | <a href="https://colab.research.google.com/github/sokrypton/ColabFold/blob/main/AlphaFold2.ipynb">https://colab.research.google.com/github/sokrypton/ColabFold/blob/main/AlphaFold2.ipynb</a> |
| PYMOLE 2.1         | Schrodinger LLC             | <a href="https://pymol.org/2/">https://pymol.org/2/</a>                                                                                                                                       |

|                |                  |                                                                                 |
|----------------|------------------|---------------------------------------------------------------------------------|
| Geneious Prime | Dotmatics        | <a href="https://www.geneious.com/">https://www.geneious.com/</a>               |
| Prism 9        | GraphPad         | <a href="https://www.graphpad.com/">https://www.graphpad.com/</a>               |
| Curveball      | Ram et al., 2019 | <a href="https://curveball.yoavram.com/">https://curveball.yoavram.com</a><br>/ |

**Table S2. Protein sequences for ToxN, TenpN, and TifA homologs**

| Name                       | Description                                                                                     | Sequence (N→C-term)                                                                                                                                                                                     |
|----------------------------|-------------------------------------------------------------------------------------------------|---------------------------------------------------------------------------------------------------------------------------------------------------------------------------------------------------------|
| <i>toxN<sub>Ec</sub></i>   | <i>toxN</i> from <i>E. coli</i> GCA_001012275                                                   | MKFYTISSSYIKYLKDFDDKVPNSEDPYNNPKAFIGIV<br>LEIEGHKYLAPLTSPKAWHANVKESSPAFFKLHENGVP<br>DNQLGLINLKFMPIIEAEVSLDDLDSMPDTPYKRMLYK<br>QLQFIRVNEDKISEKSKLLRNALQGRMQGTCDFAVLE<br>EKYQHFGKKPEDMEIDD                |
| <i>toxN<sub>Kp</sub></i>   | <i>toxN</i> from <i>K. pneumoniae</i> (accession number A0A331BKA2_KLEPN)                       | MKFYTISSRYIEYLKGFEDKVPNSEDPYQNPKAFIGIV<br>LEIQGHKYLAPLTSPKPWHSTIKESSPSFFKLHENGVP<br>NQLGLINLKFMPIIEAEVSLDDLNGMPNTSYKRMLYK<br>QLQFIRVNSDKIAEKSELLRNVLQGKMQGTCNFSLLE<br>EKYRDFGKEANDMEEGE                 |
| <i>tenpN<sub>Ec</sub></i>  | <i>tenpN</i> from <i>E. coli</i> plasmid pWP4-S17-ESBL-08_3 (accession number A0A4T8VJ30_ECOLX) | MSKQDYIQLRRTLTDQFYADNKGLQEALDGSNDGKVR<br>GYGIVVIDLNLVFGIPLRSHLNHKFGFVSESEGKVK<br>GLDYTKALLIKKEEYVSRAKIPTEPETHINDNKEKIQE<br>DFNKFVNRYIEANVKKDENILRNRYSTLKNYHKELG<br>LED                                  |
| <i>toxN<sub>Ss</sub></i>   | <i>toxN</i> from <i>S. sonnei</i> (accession number A0A3U1U8P6_SHISO)                           | MKFYTISSSYIKYLKDFDDKVPNSEDPYNNPKAFIGIV<br>LEIEGHKYLAPLTSPKAWHANIKESSPAFFKLHENGVP<br>DNQLGLINLKFMPIIEAEVSLDDLDSMPDTPYKRMLYK<br>QLQFIRVNEDKISEKSKLLRNALQGRMQGTCDFSVLE<br>EKYQHFGKKPEDMEIDD                |
| <i>toxN<sub>Vk</sub></i>   | <i>toxN</i> from <i>V. kanaloae</i> (accession number A0A2N7J7F4_9VIBR)                         | MKFYVVSNDYINHLKVKVDARVPDNYDERRAYVGVV<br>MEVCGIKYLVPLTSHKTKHKDIKPGAQTVFKIHELNNE<br>ANPLGMAQISNMLPVL DSEIQLLDMKVQSENKKKLLN<br>LQQQFLRKNSERFVKKAMRLYELVTVKKVPGLVKNC<br>CDFKALEAARAAYIPANQRQASSEGLAALAEKFNS |
| <i>toxN<sub>Ser.</sub></i> | <i>toxN</i> from <i>Serratia</i> sp. SRS-8-S-2018 (accession number A0A506VJT7_9GAMM)           | MKFYVIADSYINHLVACDQHVVYKNKGTRPYIGVVLEV<br>NGVEFLAPLTSYKEKQDKIPNSSPLIFKMYELGNEENK<br>LGMVQVNNMVPVLSSEVELLDLSTQDAKYQNLLNMQ<br>QQFLRKNQEELQKKASKLYKIVSQGVATGIVNVCCDF                                       |

|                                   |                                                                           |                                                                                                                                                                                          |
|-----------------------------------|---------------------------------------------------------------------------|------------------------------------------------------------------------------------------------------------------------------------------------------------------------------------------|
|                                   |                                                                           | KALEAMKTYVPPVAQESAVPTVAQEASSEPQSDLQD<br>KLSALCGKYSKR                                                                                                                                     |
| <i>toxN<sub>Pa</sub></i>          | <i>toxN</i> from <i>P. atrosepticum</i> plasmid pECA1039                  | MKFYTISSKYIEYLKEFDDKVPNSDPTYQNPKAFIGIV<br>LEIQGHKYLAPLTSPPKWHNNVKESLSLSCFKLHENGVP<br>ENQLGLINLKFMIPIIEAEVSLDLGNMPNTPYKRMLY<br>KQLQFIRANSDKIASKSDTLRNLVLQGMQGTGNFSL<br>EEKYRDFGKEAEDTEEGE |
| <i>tifA<sub>T2</sub></i>          | <i>tifA</i> from <i>Escherichia</i> phage T2                              | MHIVLFKPTPYNVRKNTQFKALIADTWELVLDIPAEES<br>PPFGRVEFIKFAVRPTKRQIRQCKRYFRKIVKLEKQFVT<br>CDYAKVLK                                                                                            |
| <i>tifA<sub>T4</sub></i>          | <i>tifA</i> from <i>Escherichia</i> phage T4 (NCBI: NC_0008_66.4)         | MHIVLFKPTPYNVRKNTQFKALIADTWELVLDIPAEES<br>PPFGRVEFIKFAVRPTKRQIRQCKRYFRKIVKLEKQFVT<br>CDYAEILK                                                                                            |
| <i>tifA<sub>T6</sub></i>          | <i>tifA</i> from <i>Escherichia</i> phage T6 (EMBL-EBI:AP018814)          | MHIVLFKPTPYNVRKNTQFKALIADTWELVLDIPAEES<br>PPFGRVEFIKFAVRPTKRQIRQCKRYFRKIVNLEKQFVT<br>CDYAKVLK                                                                                            |
| <i>tifA<sub>RB69</sub></i>        | <i>tifA</i> from <i>Escherichia</i> phage RB69 (NCBI:NC_004928.1)         | MYSTVFKPSTYEFASSTQWKALILEGWELMMDCEASE<br>KFPHGKVDFVKFAVRPTKRQIRQEKRFKSLK                                                                                                                 |
| <i>tifA<sub>EcS1</sub></i>        | <i>tifA</i> from <i>Escherichia</i> phage EcS1 (EMBL-EBI: LC371242)       | MKTYIHYYPGFVYAKGTAEYSFKASFELIIDQDASDK<br>LRFGCVSAKVFVTRPSKRQIRRQQKEFRKEMKALELY<br>EKEDL                                                                                                  |
| <i>tifA<sub>vB_EcoM_005</sub></i> | <i>tifA</i> from <i>Escherichia</i> phage vB_EcoM_005 (EMBL-EBI:MK295203) | MFVLTQFSKAVYSYSCQWEVFDSPSPKYGVFGRVTT<br>QAYVARPTKRQIRKLKKAHRQLIKRREQYECNVYGL                                                                                                             |
| <i>tifA<sub>vB_EcoM_VR7</sub></i> | <i>tifA</i> from <i>Escherichia</i> phage vB_EcoM_VR7 (NCBI:NC_014792.1)  | MIIQIMKPVKSGFWDKSFSGKHKFYADRVNSRWELIISQ<br>QTKGQMDVFVEFYFDVVRPTKRQIRQCKKAFRVYVRAS<br>VLRQRQLAMEPQLVTLDYAKVK                                                                              |
| <i>tifA<sub>JS98</sub></i>        | <i>tifA</i> from <i>Escherichia</i> phage JS98 (NCBI:NC_010105.1)         | MNIVLMKPTPSSFVNKSFSGKHNMFIQRTVSSWELVLS<br>VGHNDYEQEYVEFFFPVKPTKRQIRQTKRKRKIYLE<br>DSLK                                                                                                   |

|                                               |                                                                                     |                                                                                                       |
|-----------------------------------------------|-------------------------------------------------------------------------------------|-------------------------------------------------------------------------------------------------------|
| <i>tifA</i> <sub>PM2</sub>                    | <i>tifA</i> from <i>Pectobacterium</i> phage PM2<br>(NCBI: NC_028940.1)             | MNIYIMYLDRPHRPPYKSNMGWQVYIETPCSDSLPWG<br>LVDVFNYSKPTKRQIRKAKKAFYKNIKSEIESRKMM<br>MALLERD              |
| <i>tifA</i> <sub>vB_PatP_C</sub><br><i>B4</i> | <i>tifA</i> from <i>Pectobacterium</i> phage<br>vB_PatP_CB4 (EMBL-<br>EBI:KY549659) | MRTIKTSVMFFPADPVVVTKTKRDWMLADMASPAQW<br>SIAVDFIVDANPMSASIHQYAFVAKPTSKQVRQCKRKA<br>VIEHERELAQFMADYSHYL |

**Table S3. Strains**

| Name         | Genotype                                                                                | Source                           |
|--------------|-----------------------------------------------------------------------------------------|----------------------------------|
| ML6          | MG1655                                                                                  |                                  |
| DH5 $\alpha$ | Cloning strain                                                                          | Invitrogen                       |
| TOP10        | Cloning strain                                                                          |                                  |
| ML3326       | MG1655 pBAD33- <i>toxN</i> pEXT20- <i>toxI</i>                                          | Guegler and Laub, 2021           |
| ML3778       | MG1655 pBAD33- <i>toxN</i> pEXT20- <i>tifA<sub>T2</sub></i>                             | Srikant, Guegler, and Laub, 2022 |
| ML3779       | MG1655 pBAD33- <i>toxN</i> pEXT20- <i>tifA<sub>T4</sub></i>                             | Srikant, Guegler, and Laub, 2022 |
| ML3780       | MG1655 pBAD33- <i>toxN</i> pEXT20- <i>tifA<sub>T6</sub></i>                             | Srikant, Guegler, and Laub, 2022 |
| ML3781       | MG1655 pBAD33- <i>toxN</i> pEXT20- <i>tifA<sub>RB69</sub></i>                           | Srikant, Guegler, and Laub, 2022 |
| ML4188       | MG1655 pEXT20- <i>tifA<sub>vB_PatP_CB4</sub></i> -FLAG                                  | This study                       |
| ML4195       | MG1655 pEXT20- <i>tifA<sub>vB_EcoM_005</sub></i> -FLAG                                  | This study                       |
| gCKG-517     | MG1655 pBAD33- <i>toxN</i> pEXT20- <i>tifA<sub>RB69</sub></i> ( <i>P53A T54A</i> )      | This study                       |
| gCKG-646     | MG1655 pBAD33- <i>toxN</i> pEXT20- <i>tifA<sub>RB69</sub></i> ( <i>K55A R56A R59A</i> ) | This study                       |
| ML4118       | MG1655 pBAD33- <i>toxN</i> ( <i>K111N</i> ) pEXT20- <i>tifA<sub>T4</sub></i>            | This study                       |
| ML4119       | MG1655 pBAD33- <i>toxN</i> ( <i>K111R</i> ) pEXT20- <i>tifA<sub>T4</sub></i>            | This study                       |
| ML4120       | MG1655 pBAD33- <i>toxN</i> ( <i>L118S</i> ) pEXT20- <i>tifA<sub>T4</sub></i>            | This study                       |
| ML4121       | MG1655 pBAD33- <i>toxN</i> ( <i>Y115H</i> ) pEXT20- <i>tifA<sub>T4</sub></i>            | This study                       |
| ML4122       | MG1655 pBAD33- <i>toxN</i> ( <i>K111N</i> ) pEXT20- <i>tifA<sub>RB69</sub></i>          | This study                       |
| ML4123       | MG1655 pBAD33- <i>toxN</i> ( <i>K111R</i> ) pEXT20- <i>tifA<sub>RB69</sub></i>          | This study                       |
| ML4124       | MG1655 pBAD33- <i>toxN</i> ( <i>L118S</i> ) pEXT20- <i>tifA<sub>RB69</sub></i>          | This study                       |

|          |                                                                                     |            |
|----------|-------------------------------------------------------------------------------------|------------|
| ML4125   | MG1655 pBAD33- <i>toxN</i> (Y115H) pEXT20- <i>tifA</i> <sub>RB69</sub>              | This study |
| ML4126   | MG1655 pBAD33- <i>toxN</i> (K111N) pEXT20- <i>toxI</i>                              | This study |
| ML4127   | MG1655 pBAD33- <i>toxN</i> (K111R) pEXT20- <i>toxI</i>                              | This study |
| ML4128   | MG1655 pBAD33- <i>toxN</i> (L118S) pEXT20- <i>toxI</i>                              | This study |
| ML4129   | MG1655 pBAD33- <i>toxN</i> (Y115H) pEXT20- <i>toxI</i>                              | This study |
| gCKG-472 | MG1655 pBAD33- <i>toxN</i> <sub>Ec</sub> pEXT20- <i>tifA</i> <sub>EcS1</sub>        | This study |
| gCKG-473 | MG1655 pBAD33- <i>toxN</i> <sub>Ec</sub> pEXT20- <i>tifA</i> <sub>vB_EcoM_005</sub> | This study |
| gCKG-568 | MG1655 pBAD33- <i>toxN</i> <sub>Ec</sub> pEXT20- <i>tifA</i> <sub>vB_EcoM_VR7</sub> | This study |
| gCKG-474 | MG1655 pBAD33- <i>toxN</i> <sub>Ec</sub> pEXT20- <i>tifA</i> <sub>JS98</sub>        | This study |
| gCKG-471 | MG1655 pBAD33- <i>toxN</i> <sub>Ec</sub> pEXT20- <i>tifA</i> <sub>PM2</sub>         | This study |
| gCKG-475 | MG1655 pBAD33- <i>toxN</i> <sub>Ec</sub> pEXT20- <i>tifA</i> <sub>vB_PatP_CB4</sub> | This study |
| gCKG-252 | MG1655 pBAD33- <i>toxN</i> <sub>Pa</sub> pEXT20- <i>tifA</i> <sub>T2</sub>          | This study |
| gCKG-253 | MG1655 pBAD33- <i>toxN</i> <sub>Pa</sub> pEXT20- <i>tifA</i> <sub>T4</sub>          | This study |
| gCKG-254 | MG1655 pBAD33- <i>toxN</i> <sub>Pa</sub> pEXT20- <i>tifA</i> <sub>T6</sub>          | This study |
| gCKG-255 | MG1655 pBAD33- <i>toxN</i> <sub>Pa</sub> pEXT20- <i>tifA</i> <sub>RB69</sub>        | This study |
| gCKG-552 | MG1655 pBAD33- <i>toxN</i> <sub>Pa</sub> pEXT20- <i>tifA</i> <sub>EcS1</sub>        | This study |
| gCKG-560 | MG1655 pBAD33- <i>toxN</i> <sub>Pa</sub> pEXT20- <i>tifA</i> <sub>EcoM_005</sub>    | This study |
| gCKG-569 | MG1655 pBAD33- <i>toxN</i> <sub>Pa</sub> pEXT20- <i>tifA</i> <sub>EcoM_VR7</sub>    | This study |
| gCKG-577 | MG1655 pBAD33- <i>toxN</i> <sub>Pa</sub> pEXT20- <i>tifA</i> <sub>JS98</sub>        | This study |
| gCKG-257 | MG1655 pBAD33- <i>toxN</i> <sub>Pa</sub> pEXT20- <i>tifA</i> <sub>PM2</sub>         | This study |
| gCKG-258 | MG1655 pBAD33- <i>toxN</i> <sub>Pa</sub> pEXT20- <i>tifA</i> <sub>PatP_CB4</sub>    | This study |



|          |                                                                                   |            |
|----------|-----------------------------------------------------------------------------------|------------|
| gCKG-521 | MG1655 pBAD33- <i>toxN<sub>Kp</sub></i> pEXT20- <i>tifA<sub>T2</sub></i>          | This study |
| gCKG-528 | MG1655 pBAD33- <i>toxN<sub>Kp</sub></i> pEXT20- <i>tifA<sub>T4</sub></i>          | This study |
| gCKG-534 | MG1655 pBAD33- <i>toxN<sub>Kp</sub></i> pEXT20- <i>tifA<sub>T6</sub></i>          | This study |
| gCKG-540 | MG1655 pBAD33- <i>toxN<sub>Kp</sub></i> pEXT20- <i>tifA<sub>RB69</sub></i>        | This study |
| gCKG-555 | MG1655 pBAD33- <i>toxN<sub>Kp</sub></i> pEXT20- <i>tifA<sub>EcS1</sub></i>        | This study |
| gCKG-563 | MG1655 pBAD33- <i>toxN<sub>Kp</sub></i> pEXT20- <i>tifA<sub>vB_EcoM_005</sub></i> | This study |
| gCKG-572 | MG1655 pBAD33- <i>toxN<sub>Kp</sub></i> pEXT20- <i>tifA<sub>vB_EcoM_VR7</sub></i> | This study |
| gCKG-580 | MG1655 pBAD33- <i>toxN<sub>Kp</sub></i> pEXT20- <i>tifA<sub>JS98</sub></i>        | This study |
| gCKG-547 | MG1655 pBAD33- <i>toxN<sub>Kp</sub></i> pEXT20- <i>tifA<sub>PM2</sub></i>         | This study |
| gCKG-587 | MG1655 pBAD33- <i>toxN<sub>Kp</sub></i> pEXT20- <i>tifA<sub>vB_PatP_CB4</sub></i> | This study |
| gCKG-524 | MG1655 pBAD33- <i>toxN<sub>Ss</sub></i> pEXT20- <i>tifA<sub>T2</sub></i>          | This study |
| gCKG-530 | MG1655 pBAD33- <i>toxN<sub>Ss</sub></i> pEXT20- <i>tifA<sub>T4</sub></i>          | This study |
| gCKG-536 | MG1655 pBAD33- <i>toxN<sub>Ss</sub></i> pEXT20- <i>tifA<sub>T6</sub></i>          | This study |
| gCKG-542 | MG1655 pBAD33- <i>toxN<sub>Ss</sub></i> pEXT20- <i>tifA<sub>RB69</sub></i>        | This study |
| gCKG-557 | MG1655 pBAD33- <i>toxN<sub>Ss</sub></i> pEXT20- <i>tifA<sub>EcS1</sub></i>        | This study |
| gCKG-565 | MG1655 pBAD33- <i>toxN<sub>Ss</sub></i> pEXT20- <i>tifA<sub>vB_EcoM_005</sub></i> | This study |
| gCKG-574 | MG1655 pBAD33- <i>toxN<sub>Ss</sub></i> pEXT20- <i>tifA<sub>vB_EcoM_VR7</sub></i> | This study |
| gCKG-582 | MG1655 pBAD33- <i>toxN<sub>Ss</sub></i> pEXT20- <i>tifA<sub>JS98</sub></i>        | This study |
| gCKG-549 | MG1655 pBAD33- <i>toxN<sub>Ss</sub></i> pEXT20- <i>tifA<sub>PM2</sub></i>         | This study |
| gCKG-589 | MG1655 pBAD33- <i>toxN<sub>Ss</sub></i> pEXT20- <i>tifA<sub>vB_PatP_CB4</sub></i> | This study |
| gCKG-525 | MG1655 pBAD33- <i>toxN<sub>Vk</sub></i> pEXT20- <i>tifA<sub>T2</sub></i>          | This study |

|          |                                                                                     |            |
|----------|-------------------------------------------------------------------------------------|------------|
| gCKG-531 | MG1655 pBAD33- <i>toxN<sub>Vk</sub></i> pEXT20- <i>tifA<sub>T4</sub></i>            | This study |
| gCKG-537 | MG1655 pBAD33- <i>toxN<sub>Vk</sub></i> pEXT20- <i>tifA<sub>T6</sub></i>            | This study |
| gCKG-543 | MG1655 pBAD33- <i>toxN<sub>Vk</sub></i> pEXT20- <i>tifA<sub>RB69</sub></i>          | This study |
| gCKG-558 | MG1655 pBAD33- <i>toxN<sub>Vk</sub></i> pEXT20- <i>tifA<sub>EcS1</sub></i>          | This study |
| gCKG-566 | MG1655 pBAD33- <i>toxN<sub>Vk</sub></i> pEXT20- <i>tifA<sub>vB_EcoM_005</sub></i>   | This study |
| gCKG-575 | MG1655 pBAD33- <i>toxN<sub>Vk</sub></i> pEXT20- <i>tifA<sub>vB_EcoM_VR7</sub></i>   | This study |
| gCKG-583 | MG1655 pBAD33- <i>toxN<sub>Vk</sub></i> pEXT20- <i>tifA<sub>JS98</sub></i>          | This study |
| gCKG-550 | MG1655 pBAD33- <i>toxN<sub>Vk</sub></i> pEXT20- <i>tifA<sub>PM2</sub></i>           | This study |
| gCKG-590 | MG1655 pBAD33- <i>toxN<sub>Vk</sub></i> pEXT20- <i>tifA<sub>vB_PatP_CB4</sub></i>   | This study |
| gCKG-526 | MG1655 pBAD33- <i>toxN<sub>Ser.</sub></i> pEXT20- <i>tifA<sub>T2</sub></i>          | This study |
| gCKG-532 | MG1655 pBAD33- <i>toxN<sub>Ser.</sub></i> pEXT20- <i>tifA<sub>T4</sub></i>          | This study |
| gCKG-538 | MG1655 pBAD33- <i>toxN<sub>Ser.</sub></i> pEXT20- <i>tifA<sub>T6</sub></i>          | This study |
| gCKG-544 | MG1655 pBAD33- <i>toxN<sub>Ser.</sub></i> pEXT20- <i>tifA<sub>RB69</sub></i>        | This study |
| gCKG-559 | MG1655 pBAD33- <i>toxN<sub>Ser.</sub></i> pEXT20- <i>tifA<sub>EcS1</sub></i>        | This study |
| gCKG-567 | MG1655 pBAD33- <i>toxN<sub>Ser.</sub></i> pEXT20- <i>tifA<sub>vB_EcoM_005</sub></i> | This study |
| gCKG-576 | MG1655 pBAD33- <i>toxN<sub>Ser.</sub></i> pEXT20- <i>tifA<sub>vB_EcoM_VR7</sub></i> | This study |
| gCKG-584 | MG1655 pBAD33- <i>toxN<sub>Ser.</sub></i> pEXT20- <i>tifA<sub>JS98</sub></i>        | This study |
| gCKG-551 | MG1655 pBAD33- <i>toxN<sub>Ser.</sub></i> pEXT20- <i>tifA<sub>PM2</sub></i>         | This study |
| gCKG-591 | MG1655 pBAD33- <i>toxN<sub>Ser.</sub></i> pEXT20- <i>tifA<sub>vB_PatP_CB4</sub></i> | This study |
| gCKG-523 | MG1655 pBAD33- <i>tenpN<sub>Ec</sub></i> pEXT20- <i>tifA<sub>T2</sub></i>           | This study |
| gCKG-529 | MG1655 pBAD33- <i>tenpN<sub>Ec</sub></i> pEXT20- <i>tifA<sub>T4</sub></i>           | This study |

|          |                                                                                                 |                        |
|----------|-------------------------------------------------------------------------------------------------|------------------------|
| gCKG-535 | MG1655 pBAD33- <i>tenp</i> <sub>N<sub>Ec</sub></sub> pEXT20- <i>tifA</i> <sub>T6</sub>          | This study             |
| gCKG-541 | MG1655 pBAD33- <i>tenp</i> <sub>N<sub>Ec</sub></sub> pEXT20- <i>tifA</i> <sub>RB69</sub>        | This study             |
| gCKG-556 | MG1655 pBAD33- <i>tenp</i> <sub>N<sub>Ec</sub></sub> pEXT20- <i>tifA</i> <sub>EcS1</sub>        | This study             |
| gCKG-564 | MG1655 pBAD33- <i>tenp</i> <sub>N<sub>Ec</sub></sub> pEXT20- <i>tifA</i> <sub>vB_EcoM_005</sub> | This study             |
| gCKG-573 | MG1655 pBAD33- <i>tenp</i> <sub>N<sub>Ec</sub></sub> pEXT20- <i>tifA</i> <sub>vB_EcoM_VR7</sub> | This study             |
| gCKG-581 | MG1655 pBAD33- <i>tenp</i> <sub>N<sub>Ec</sub></sub> pEXT20- <i>tifA</i> <sub>JS98</sub>        | This study             |
| gCKG-548 | MG1655 pBAD33- <i>tenp</i> <sub>N<sub>Ec</sub></sub> pEXT20- <i>tifA</i> <sub>PM2</sub>         | This study             |
| gCKG-588 | MG1655 pBAD33- <i>tenp</i> <sub>N<sub>Ec</sub></sub> pEXT20- <i>tifA</i> <sub>vB_PatP_CB4</sub> | This study             |
| ML4197   | MG1655 pBAD33- <i>toxN</i> -chitin binding domain pEXT20                                        | This study             |
| ML4198   | MG1655 pBAD33- <i>toxN</i> -chitin binding domain pEXT20- <i>tifA</i> <sub>RB69</sub>           | This study             |
| ML4189   | MG1655 pBAD33 pEXT20- <i>tifA</i> <sub>RB69</sub> -FLAG                                         | This study             |
| ML4190   | MG1655 pBAD33- <i>toxN</i> pEXT20- <i>tifA</i> <sub>RB69</sub> -FLAG                            | This study             |
| ML4192   | MG1655 pBAD33 pEXT20- <i>tifA</i> <sub>RB69</sub> -MBP-His <sub>6</sub>                         | This study             |
| ML4193   | MG1655 pBAD33- <i>toxN</i> pEXT20- <i>tifA</i> <sub>RB69</sub> -MBP-His <sub>6</sub>            | This study             |
| ML3328   | MG1655 pBR322- <i>toxIN</i>                                                                     | Guegler and Laub, 2021 |
| ML4130   | MG1655 pBR322- <i>toxI</i> - <i>toxN</i> (L118S)                                                | This study             |
| ML4131   | MG1655 pBR322- <i>toxI</i> - <i>toxN</i> (Y115H)                                                | This study             |
| ML4132   | MG1655 pBR322- <i>toxI</i> - <i>toxN</i> (K111N)                                                | This study             |
| ML4133   | MG1655 pBR322- <i>toxI</i> - <i>toxN</i> (K111R)                                                | This study             |
| ML4134   | MG1655 pBR322- <i>toxI</i> - <i>toxN</i> (L118S) pKVS45- <i>tifA</i> <sub>T4</sub>              | This study             |
| ML4135   | MG1655 pBR322- <i>toxI</i> - <i>toxN</i> (Y115H) pKVS45- <i>tifA</i> <sub>T4</sub>              | This study             |

|        |                                                                                                       |                                  |
|--------|-------------------------------------------------------------------------------------------------------|----------------------------------|
| ML4136 | MG1655 pBR322- <i>toxI-toxN(K111N)</i> pKVS45- <i>tifA<sub>T4</sub></i>                               | This study                       |
| ML4137 | MG1655 pBR322- <i>toxI-toxN(K111R)</i> pKVS45- <i>tifA<sub>T4</sub></i>                               | This study                       |
| ML4138 | MG1655 pBR322- <i>toxI-toxN(L118S)</i> pKVS45- <i>tifA<sub>RB69</sub></i>                             | This study                       |
| ML4139 | MG1655 pBR322- <i>toxI-toxN(Y115H)</i> pKVS45- <i>tifA<sub>RB69</sub></i>                             | This study                       |
| ML4140 | MG1655 pBR322- <i>toxI-toxN(K111N)</i> pKVS45- <i>tifA<sub>RB69</sub></i>                             | This study                       |
| ML4141 | MG1655 pBR322- <i>toxI-toxN(K111R)</i> pKVS45- <i>tifA<sub>RB69</sub></i>                             | This study                       |
| ML4142 | MG1655 pBR322- <i>toxI-toxN(L118S)</i> pKVS45                                                         | This study                       |
| ML4143 | MG1655 pBR322- <i>toxI-toxN(Y115H)</i> pKVS45                                                         | This study                       |
| ML4144 | MG1655 pBR322- <i>toxI-toxN(K111N)</i> pKVS45                                                         | This study                       |
| ML4145 | MG1655 pBR322- <i>toxI-toxN(K111R)</i> pKVS45                                                         | This study                       |
| ML3774 | MG1655 pBR322- <i>toxIN</i> pKVS45- <i>tifA<sub>T4</sub></i>                                          | Srikant, Guegler, and Laub, 2022 |
| ML3786 | MG1655 pBR322- <i>toxI-toxN-His<sub>6</sub></i> pKVS45- <i>tifA<sub>T4</sub>-FLAG</i>                 | Srikant, Guegler, and Laub, 2022 |
| ML4171 | MG1655 pBR322- <i>toxI-toxN-His<sub>6</sub></i> pKVS45- <i>tifA<sub>T4</sub>(P53A T54A)-FLAG</i>      | This study                       |
| ML4172 | MG1655 pBR322- <i>toxI-toxN-His<sub>6</sub></i> pKVS45- <i>tifA<sub>T4</sub>(K55A R56A R59A)-FLAG</i> | This study                       |
| ML4156 | MG1655 pBR322- <i>toxI-toxN-His<sub>6</sub></i> pKVS45- <i>tifA<sub>T4</sub>(F41S)-FLAG</i>           | This study                       |
| ML4157 | MG1655 pBR322- <i>toxI-toxN-His<sub>6</sub></i> pKVS45- <i>tifA<sub>T4</sub>(F41H)-FLAG</i>           | This study                       |
| ML4185 | MG1655 pBR322- <i>toxI-toxN(K55A)-His<sub>6</sub></i> pKVS45- <i>tifA<sub>T4</sub>-FLAG</i>           | This study                       |
| ML4158 | T7 express pTXB1- <i>toxN</i> pACYC- <i>tifA<sub>RB69</sub></i>                                       | This study                       |

|          |                                                                                   |                                                           |
|----------|-----------------------------------------------------------------------------------|-----------------------------------------------------------|
| ML4159   | T7 express pTXB1- <i>toxN</i> pACYC- <i>tifA</i> <sub>RB69</sub> -FLAG            | This study                                                |
| ML4177   | T7 express pTXB1- <i>toxN</i> pACYC Duet- <i>toxI-tifA</i> <sub>RB69</sub>        | This study                                                |
| ML4163   | T7 express pET- <i>tifA</i> <sub>RB69</sub> -MBP-His <sub>6</sub>                 | This study; parental vector from Addgene (Plasmid #37237) |
| ML4164   | T7 express pET- <i>tifA</i> <sub>RB69</sub> (P53A T54A)-MBP-His <sub>6</sub>      | This study; parental vector from Addgene (Plasmid #37237) |
| ML4165   | T7 express pET- <i>tifA</i> <sub>RB69</sub> (K55A R56A R59A)-MBP-His <sub>6</sub> | This study; parental vector from Addgene (Plasmid #37237) |
| ML3343   | DH5α pBAD33- <i>toxN</i> (aka <i>toxN</i> <sub>Ec</sub> )                         | Guegler and Laub, 2021                                    |
| ML3344   | DH5α pBAD33                                                                       | Guegler and Laub, 2021                                    |
| gCKG-407 | DH5α pBAD33- <i>toxN</i> (K111N)                                                  | This study                                                |
| gCKG-408 | DH5α pBAD33- <i>toxN</i> (K111R)                                                  | This study                                                |
| gCKG-410 | DH5α pBAD33- <i>toxN</i> (Y115H)                                                  | This study                                                |
| gCKG-409 | DH5α pBAD33- <i>toxN</i> (L118S)                                                  | This study                                                |
| ML4100   | DH5α pBAD33- <i>toxN</i> <sub>Pa</sub>                                            | This study                                                |
| ML4101   | DH5α pBAD33- <i>toxN</i> <sub>Kp</sub>                                            | This study                                                |
| ML4102   | DH5α pBAD33- <i>toxN</i> <sub>Ss</sub>                                            | This study                                                |
| ML4104   | DH5α pBAD33- <i>toxN</i> <sub>Vk</sub>                                            | This study                                                |
| ML4105   | DH5α pBAD33- <i>toxN</i> <sub>Ser</sub>                                           | This study                                                |
| ML4106   | DH5α pBAD33- <i>tenpN</i> <sub>Ec</sub>                                           | This study                                                |
| ML3345   | DH5α pEXT20- <i>toxI</i>                                                          | Guegler and Laub, 2021                                    |
| ML1978   | DH5α pEXT20                                                                       | E. coli Genetic Stock Center, #12325                      |
| ML3814   | TOP10 pEXT20- <i>tifA</i> <sub>T2</sub>                                           | Srikant, Guegler, and Laub, 2022                          |

|        |                                                           |                                  |
|--------|-----------------------------------------------------------|----------------------------------|
| ML3815 | TOP10 pEXT20- <i>tifA</i> <sub>T4</sub>                   | Srikant, Guegler, and Laub, 2022 |
| ML3816 | TOP10 pEXT20- <i>tifA</i> <sub>T6</sub>                   | Srikant, Guegler, and Laub, 2022 |
| ML3817 | DH5α pEXT20- <i>tifA</i> <sub>RB69</sub>                  | Srikant, Guegler, and Laub, 2022 |
| ML4173 | DH5α pEXT20- <i>tifA</i> <sub>RB69</sub> (P53A T54A)      | This study                       |
| ML4174 | DH5α pEXT20- <i>tifA</i> <sub>RB69</sub> (K55A R56A R59A) | This study                       |
| ML4146 | DH5α pEXT20- <i>tifA</i> <sub>T4</sub> (F41S)             | This study                       |
| ML4147 | DH5α pEXT20- <i>tifA</i> <sub>T4</sub> (F41H)             | This study                       |
| ML4148 | DH5α pEXT20- <i>tifA</i> <sub>RB69</sub> (H41F)           | This study                       |
| ML4149 | DH5α pEXT20- <i>tifA</i> <sub>RB69</sub> (H41S)           | This study                       |
| ML4107 | DH5α pEXT20- <i>tifA</i> <sub>EcS1</sub>                  | This study                       |
| ML4108 | DH5α pEXT20- <i>tifA</i> <sub>vB_EcoM_005</sub>           | This study                       |
| ML4109 | DH5α pEXT20- <i>tifA</i> <sub>vB_EcoM_VR7</sub>           | This study                       |
| ML4110 | DH5α pEXT20- <i>tifA</i> <sub>JS98</sub>                  | This study                       |
| ML4111 | DH5α pEXT20- <i>tifA</i> <sub>PM2</sub>                   | This study                       |
| ML4112 | DH5α pEXT20- <i>tifA</i> <sub>vB_PatP_CB4</sub>           | This study                       |
| ML3346 | DH5α pBR322- <i>toxIN</i>                                 | Guegler and Laub, 2021           |
| ML4114 | DH5α pBR322- <i>toxI-toxN</i> (K111N)                     | This study                       |
| ML4115 | DH5α pBR322- <i>toxI-toxN</i> (K111R)                     | This study                       |
| ML4116 | TOP10 pBR322- <i>toxI-toxN</i> (Y115H)                    | This study                       |
| ML4117 | TOP10 pBR322- <i>toxI-toxN</i> (L118S)                    | This study                       |
| ML3349 | DH5α pBR322- <i>toxI-toxN</i> -His <sub>6</sub>           | Guegler and Laub, 2021           |

|        |                                                                            |                                                           |
|--------|----------------------------------------------------------------------------|-----------------------------------------------------------|
| ML3810 | DH5α pKVS45- <i>tifA<sub>T4</sub></i>                                      | Srikant, Guegler, and Laub, 2022                          |
| ML3821 | TOP10 pKVS45- <i>tifA<sub>T4</sub></i> -FLAG                               | Srikant, Guegler, and Laub, 2022                          |
| ML4175 | DH5α pKVS45- <i>tifA<sub>T4</sub></i> (P53A T54A)-FLAG                     | This study                                                |
| ML4176 | DH5α pKVS45- <i>tifA<sub>T4</sub></i> (K55A R56A R59A)-FLAG                | This study                                                |
| ML4150 | DH5α pKVS45- <i>tifA<sub>T4</sub></i> (F41S)-FLAG                          | This study                                                |
| ML4151 | DH5α pKVS45- <i>tifA<sub>T4</sub></i> (F41H)-FLAG                          | This study                                                |
| ML4160 | DH5α pTXB1- <i>toxN</i>                                                    | This study                                                |
| ML4161 | DH5α pACYC- <i>tifA<sub>RB69</sub></i>                                     | This study; parental vector is pACYC Duet                 |
| ML4180 | DH5α pACYC Duet- <i>toxI-tifA<sub>RB69</sub></i>                           |                                                           |
| ML4162 | DH5α pACYC- <i>tifA<sub>RB69</sub></i> -FLAG                               |                                                           |
| ML4166 | DH5α pET- <i>tifA<sub>RB69</sub></i> -MBP-His <sub>6</sub>                 | This study; parental vector from Addgene (Plasmid #37237) |
| ML4167 | DH5α pET- <i>tifA<sub>RB69</sub></i> (P53A T54A)-MBP-His <sub>6</sub>      | This study; parental vector from Addgene (Plasmid #37237) |
| ML4168 | DH5α pET- <i>tifA<sub>RB69</sub></i> (K55A R56A R59A)-MBP-His <sub>6</sub> | This study; parental vector from Addgene (Plasmid #37237) |
| ML3347 | TOP10 pBR322- <i>toxI-toxN</i> (K55A)                                      | Guegler and Laub, 2021                                    |
| ML4184 | DH5α pBR322- <i>toxI-toxN</i> (K55A)-His <sub>6</sub>                      | This study                                                |
| ML4186 | DH5α pEXT20- <i>tifA<sub>RB69</sub></i> -FLAG                              | This study                                                |
| ML4191 | DH5α pEXT20- <i>tifA<sub>RB69</sub></i> -MBP-His <sub>6</sub>              | This study                                                |
| ML4187 | DH5α pEXT20- <i>tifA<sub>vB_PatP_CB4</sub></i> -FLAG                       | This study                                                |
| ML4194 | DH5α pEXT20- <i>tifA<sub>vB_EcoM_005</sub></i> -FLAG                       | This study                                                |

|        |                                                         |            |
|--------|---------------------------------------------------------|------------|
| ML4196 | DH5 $\alpha$ pBAD33- <i>toxN</i> -chitin binding domain | This study |
|--------|---------------------------------------------------------|------------|



**Table S4. Plasmids**

| <b>Plasmid</b>                                   | <b>Description</b>                                 | <b>Source</b>                        |
|--------------------------------------------------|----------------------------------------------------|--------------------------------------|
| pBAD33                                           | Arabinose inducible vector                         | Guzman et al., 1995                  |
| pBAD33- <i>toxN</i> ( <i>toxN<sub>Ec</sub></i> ) | Arabinose inducible ToxN expression                | Guegler and Laub, 2021               |
| pBAD33- <i>toxN</i> ( <i>K111N</i> )             | Arabinose inducible ToxN escape mutant expression  | This study                           |
| pBAD33- <i>toxN</i> ( <i>K111R</i> )             | Arabinose inducible ToxN escape mutant expression  | This study                           |
| pBAD33- <i>toxN</i> ( <i>Y115H</i> )             | Arabinose inducible ToxN escape mutant expression  | This study                           |
| pBAD33- <i>toxN</i> ( <i>L118S</i> )             | Arabinose inducible ToxN escape mutant expression  | This study                           |
| pBAD33- <i>toxN</i> -chitin binding domain       | Arabinose inducible ToxN fusion protein expression | This study                           |
| pBAD33- <i>toxN<sub>Pa</sub></i>                 | Arabinose inducible ToxN expression                | This study                           |
| pBAD33- <i>toxN<sub>Kp</sub></i>                 | Arabinose inducible ToxN expression                | This study                           |
| pBAD33- <i>toxN<sub>Ss</sub></i>                 | Arabinose inducible ToxN expression                | This study                           |
| pBAD33- <i>toxN<sub>Vk</sub></i>                 | Arabinose inducible ToxN expression                | This study                           |
| pBAD33- <i>toxN<sub>Ser</sub></i>                | Arabinose inducible ToxN expression                | This study                           |
| pBAD33- <i>tenpN<sub>Ec</sub></i>                | Arabinose inducible ToxN expression                | This study                           |
| pEXT20                                           | IPTG inducible vector                              | E. coli Genetic Stock Center, #12325 |
| pEXT20- <i>toxI</i>                              | IPTG inducible <i>toxI</i> expression              | Guegler and Laub, 2021               |
| pEXT20- <i>tifA<sub>T2</sub></i>                 | IPTG inducible <i>tifA</i> expression              | Srikant, Guegler, and Laub, 2022     |

|                                                           |                                                             |                                  |
|-----------------------------------------------------------|-------------------------------------------------------------|----------------------------------|
| pEXT20- <i>tifA</i> <sub>T4</sub>                         | IPTG inducible <i>tifA</i> expression                       | Srikant, Guegler, and Laub, 2022 |
| pEXT20- <i>tifA</i> <sub>T6</sub>                         | IPTG inducible <i>tifA</i> expression                       | Srikant, Guegler, and Laub, 2022 |
| pEXT20- <i>tifA</i> <sub>RB69</sub>                       | IPTG inducible <i>tifA</i> expression                       | Srikant, Guegler, and Laub, 2022 |
| pEXT20- <i>tifA</i> <sub>RB69</sub> (P53A T54A)           | IPTG inducible <i>tifA</i> expression                       | This study                       |
| pEXT20- <i>tifA</i> <sub>RB69</sub> (K55A R56A R59A)      | IPTG inducible <i>tifA</i> expression                       | This study                       |
| pEXT20- <i>tifA</i> <sub>T4</sub> (F41S)                  | IPTG inducible <i>tifA</i> expression                       | This study                       |
| pEXT20- <i>tifA</i> <sub>T4</sub> (F41H)                  | IPTG inducible <i>tifA</i> expression                       | This study                       |
| pEXT20- <i>tifA</i> <sub>RB69</sub> (H41F)                | IPTG inducible <i>tifA</i> expression                       | This study                       |
| pEXT20- <i>tifA</i> <sub>RB69</sub> (H41S)                | IPTG inducible <i>tifA</i> expression                       | This study                       |
| pEXT20- <i>tifA</i> <sub>RB69</sub> -FLAG                 | IPTG inducible <i>tifA</i> -FLAG expression                 | This study                       |
| pEXT20- <i>tifA</i> <sub>RB69</sub> -MBP-His <sub>6</sub> | IPTG inducible <i>tifA</i> -MBP-His <sub>6</sub> expression | This study                       |
| pEXT20- <i>tifA</i> <sub>EcS1</sub>                       | IPTG inducible <i>tifA</i> expression                       | This study                       |
| pEXT20- <i>tifA</i> <sub>vB_EcoM_005</sub>                | IPTG inducible <i>tifA</i> expression                       | This study                       |
| pEXT20- <i>tifA</i> <sub>vB_EcoM_VR7</sub>                | IPTG inducible <i>tifA</i> expression                       | This study                       |
| pEXT20- <i>tifA</i> <sub>JS98</sub>                       | IPTG inducible <i>tifA</i> expression                       | This study                       |
| pEXT20- <i>tifA</i> <sub>PM2</sub>                        | IPTG inducible <i>tifA</i> expression                       | This study                       |
| pEXT20- <i>tifA</i> <sub>vB_PatP_CB4</sub>                | IPTG inducible <i>tifA</i> expression                       | This study                       |
| pEXT20- <i>tifA</i> <sub>vB_PatP_CB4</sub> -FLAG          | IPTG inducible <i>tifA</i> -FLAG expression                 | This study                       |
| pEXT20- <i>tifA</i> <sub>vB_EcoM_005</sub> -FLAG          | IPTG inducible <i>tifA</i> -FLAG expression                 | This study                       |

|                                                         |                                                                                                    |                        |
|---------------------------------------------------------|----------------------------------------------------------------------------------------------------|------------------------|
| pBR322- <i>toxIN</i>                                    | Full <i>toxIN</i> locus                                                                            | Guegler and Laub, 2021 |
| pBR322- <i>toxI-toxN</i> -His <sub>6</sub>              | <i>toxIN</i> locus with C-terminal His <sub>6</sub> -tagged ToxN                                   | Guegler and Laub, 2021 |
| pBR322- <i>toxI-toxN</i> (K111N)                        | <i>toxIN</i> locus with TifA-insensitive ToxN                                                      | This study             |
| pBR322- <i>toxI-toxN</i> (K111R)                        | <i>toxIN</i> locus with TifA-insensitive ToxN                                                      | This study             |
| pBR322- <i>toxI-toxN</i> (Y115H)                        | <i>toxIN</i> locus with TifA-insensitive ToxN                                                      | This study             |
| pBR322- <i>toxI-toxN</i> (L118S)                        | <i>toxIN</i> locus with TifA-insensitive ToxN                                                      | This study             |
| pBR322- <i>toxI-toxN</i> (K55A)-His <sub>6</sub>        | <i>toxIN</i> locus with nuclease-inactive, His <sub>6</sub> -tagged ToxN                           | This study             |
| pKVS45- <i>tifA</i> <sub>T4</sub>                       | aTc inducible TifA expression                                                                      | This study             |
| pKVS45- <i>tifA</i> <sub>T4</sub> -FLAG                 | aTc inducible expression of C-terminal FLAG-tagged TifA                                            | This study             |
| pKVS45- <i>tifA</i> <sub>T4</sub> (P53A T54A)-FLAG      | aTc inducible expression of C-terminal FLAG-tagged TifA mutant                                     | This study             |
| pKVS45- <i>tifA</i> <sub>T4</sub> (K55A R56A R59A)-FLAG | aTc inducible expression of C-terminal FLAG-tagged TifA mutant                                     | This study             |
| pKVS45- <i>tifA</i> <sub>T4</sub> (F41S)-FLAG           | aTc inducible expression of C-terminal FLAG-tagged TifA mutant                                     | This study             |
| pKVS45- <i>tifA</i> <sub>T4</sub> (F41H)-FLAG           | aTc inducible expression of C-terminal FLAG-tagged TifA mutant                                     | This study             |
| pTXB1- <i>toxN</i>                                      | IPTG inducible ToxN (with C-term chitin binding domain) overexpression driven by T7 RNA polymerase | This study             |
| pACYC- <i>tifA</i> <sub>RB69</sub>                      | IPTG inducible TifA overexpression driven by T7 RNA polymerase                                     | This study             |

|                                                                        |                                                                                                     |            |
|------------------------------------------------------------------------|-----------------------------------------------------------------------------------------------------|------------|
| pACYC- <i>tifA</i> <sub>RB69</sub> -FLAG                               | IPTG inducible TifA-FLAG overexpression driven by T7 RNA polymerase                                 | This study |
| pACYC Duet- <i>toxI-tifA</i> <sub>RB69</sub>                           | IPTG inducible <i>toxI</i> and TifA overexpression driven by T7 RNA polymerase                      | This study |
| pET- <i>tifA</i> <sub>RB69</sub> -MBP-His <sub>6</sub>                 | IPTG inducible TifA-MBP-His <sub>6</sub> overexpression driven by T7 RNA polymerase                 | This study |
| pET- <i>tifA</i> <sub>RB69</sub> (P53A T54A)-MBP-His <sub>6</sub>      | IPTG inducible TifA(P53A T54A)-MBP-His <sub>6</sub> overexpression driven by T7 RNA polymerase      | This study |
| pET- <i>tifA</i> <sub>RB69</sub> (K55A R56A R59A)-MBP-His <sub>6</sub> | IPTG inducible TifA(K55A R56A R59A)-MBP-His <sub>6</sub> overexpression driven by T7 RNA polymerase | This study |
| pACYC Duet- <i>toxI-tifA</i> <sub>RB69</sub> -FLAG                     | IPTG inducible <i>toxI</i> and TifA-FLAG overexpression driven by T7 RNA polymerase                 | This study |
| pACYC Duet- <i>toxI-tifA</i> <sub>RB69</sub> (K55A R56A R59A)          | IPTG inducible <i>toxI</i> and TifA(K55A R56A R59A) overexpression driven by T7 RNA polymerase      | This study |

**Table S5. Primers and Oligos**

| <b>Number</b> | <b>Purpose</b>                                                                                               | <b>Sequence (5'→3')</b>                                    |
|---------------|--------------------------------------------------------------------------------------------------------------|------------------------------------------------------------|
| CKG-499       | Construct pBR322- <i>toxI-toxN(Y115H)</i><br>(forward)                                                       | CATAAACAGTTACAATTTATTCGTGTAATGAAGAT<br>AAAATATCTG          |
| CKG-500       | Construct pBR322- <i>toxI-toxN(Y115H)</i><br>(reverse)                                                       | TAGCATTCTTTTGTAAGGCGTATCAGGCATG                            |
| CKG-501       | Construct pBR322- <i>toxI-toxN(L118S)</i><br>(forward)                                                       | AGCCAATTTATTCGTGTAATGAAGATAAAATATCT<br>GAAAAATCAAACTATTAAG |
| CKG-502       | Construct pBR322- <i>toxI-toxN(L118S)</i><br>(reverse)                                                       | CTGTTTATATAGCATTCTTTTGTAAGGCGTATCAGGC                      |
| CKG-545       | Construct pBR322- <i>toxI-toxN(K111N)</i><br>(forward)                                                       | AACAGAATGCTATATAAACAGTTACAATTTATTCGT<br>GTAAATGAAG         |
| CKG-546       | Construct pBR322- <i>toxI-toxN(K111N/K111R)</i><br>(reverse)                                                 | GTAAGGCGTATCAGGCATGCTATCCAGATC                             |
| CKG-547       | Construct pBR322- <i>toxI-toxN(K111R)</i><br>(forward)                                                       | CGTAGAATGCTATATAAACAGTTACAATTTATTCGT<br>GTAAATGAAG         |
| CKG-597       | Construct pEXT20- <i>tifA<sub>T4</sub>(F41S)</i><br>(forward)                                                | TCTGGTCGAGTGGAAATTTATTAAGTTTGCTGTTTCGCC                    |
| CKG-598       | Construct pEXT20- <i>tifA<sub>T4</sub>(F41S)</i> and<br>pEXT20- <i>tifA<sub>T4</sub>(F41H)</i> (reverse)     | TGGAGGGCTTTCTTCTGCTGGAATATC                                |
| CKG-599       | Construct pEXT20- <i>tifA<sub>T4</sub>(F41H)</i><br>(forward)                                                | CATGGTCGAGTGGAAATTTATTAAGTTTGCTGTTTCGCC                    |
| CKG-600       | Construct pEXT20- <i>tifA<sub>RB69</sub>(H41F)</i><br>(forward)                                              | TTTGGCAAAGTGGACTTCGTAAATTTGCTGTAC                          |
| CKG-601       | Construct pEXT20- <i>tifA<sub>RB69</sub>(H41F)</i><br>and pEXT20- <i>tifA<sub>RB69</sub>(H41S)</i> (reverse) | TGGAAACTTTTCAGATGCTTCACAGTCCATC                            |

|         |                                                                                                     |                                                                                            |
|---------|-----------------------------------------------------------------------------------------------------|--------------------------------------------------------------------------------------------|
| CKG-602 | Construct pEXT20- <i>tifA</i> <sub>RB69</sub> ( <i>H41S</i> )<br>(forward)                          | TCTGGCAAAGTGGACTTCGTAAATTTGCTGTAC                                                          |
| CKG-625 | Construct pEXT20- <i>tifA</i> <sub>RB69</sub> ( <i>K55A</i><br><i>R56A R59A</i> ) (forward)         | CGTCCGACTGCGGCGCAGATTG                                                                     |
| CKG-626 | Construct pEXT20- <i>tifA</i> <sub>RB69</sub> ( <i>K55A</i><br><i>R56A R59A</i> ) (reverse)         | TACAGCAAATTTAACGAAGTCCACTTTGCCG                                                            |
| CKG-603 | Construct pKVS45- <i>tifA</i> <sub>T4</sub> ( <i>P53A</i><br><i>T54A</i> ) (forward)                | GCGGCAAAGAGGCAGATTCGCCAATGCAAAG                                                            |
| CKG-604 | Construct pKVS45- <i>tifA</i> <sub>T4</sub> ( <i>P53A</i><br><i>T54A</i> ) (reverse)                | GCGAACAGCAAACCTTAATAAATTCCACTCGACC                                                         |
| CKG-523 | Construct pKVS45- <i>tifA</i> <sub>T4</sub> ( <i>R52A</i><br><i>K55A R56A R59A</i> ) (forward)      | CGCAATCTGCGCCGCGTAGGCGCAACAGCAAACCT<br>AATAAATTCCACTCGACCAAATGG                            |
| CKG-524 | Construct pKVS45- <i>tifA</i> <sub>T4</sub> ( <i>R52A</i><br><i>K55A R56A R59A</i> ) (reverse)      | CAATGCAAAGATACTTTTCGTAAAATCGTCAAGTTA<br>GAGAAAC                                            |
| CKG-411 | Construct pKVS45- <i>tifA</i> <sub>T4</sub> ( <i>R52A</i><br><i>K55A R56A R59A</i> )-FLAG(forward)  | TTACTTGTCATCGTCGTCCTTGTAGTCGCTCCGCTT<br>CCTTTTAAAATTTCTGCGTAATCACATGTTACAACT<br>GTTTC      |
| CKG-404 | Construct pKVS45- <i>tifA</i> <sub>T4</sub> ( <i>R52A</i><br><i>K55A R56A R59A</i> )-FLAG (reverse) | TTATGCATAATCCGGAACATCATACGGATAGCTTCC<br>GCTTCCTTTTAAAATTTCTGCGTAATCACATGTTACA<br>AACTGTTTC |
| CKG-627 | Construct pKVS45- <i>tifA</i> <sub>T4</sub> ( <i>K55A</i><br><i>R56A R59A</i> ) (forward)           | CGCCCTACGGGCGGCAGATTG                                                                      |
| CKG-628 | Construct pKVS45- <i>tifA</i> <sub>T4</sub> ( <i>K55A</i><br><i>R56A R59A</i> ) (reverse)           | AACAGCAAACCTTAATAAATTCCACTCGACCAAATGG                                                      |
| CKG-413 | Construct pTXB1- <i>toxN</i> (forward)                                                              | GGTGGTCATATGAAATTTTACACAATATCAAGCAGT<br>TACATAAAATACCTG                                    |
| CKG-415 | Construct pTXB1- <i>toxN</i> (reverse)                                                              | GGTGGTTGCTCTTCCGCGATCGTCTATTTCCATG<br>TCTTCAGGTTTTTACCG                                    |

|         |                                                                                                                   |                                                                  |
|---------|-------------------------------------------------------------------------------------------------------------------|------------------------------------------------------------------|
| CKG-416 | PCR-amplify <i>toxI</i> for construction of pACYC- <i>toxI</i> (forward)                                          | CCCTGTAGAAATAATTTTGTTTAACTTTAATCCTAGT<br>TGTAAGCCCAAGCGAAGATCATG |
| CKG-139 | PCR-amplify <i>toxI</i> for construction of pACYC- <i>toxI</i> (reverse)                                          | TTGCTCAGCGGTGGCAGCAGCATTTCCTCGTAAAA<br>AAGGCGACTGTGTATAG         |
| CKG-147 | Linearize pACYC for construction of pACYC- <i>toxI</i> (forward)                                                  | ATTAAAGTTAAACAAAATTATTTCTACAGGGAATT<br>GTTATC                    |
| CKG-134 | Linearize pACYC for construction of pACYC- <i>toxI</i> (reverse)                                                  | CTGCTGCCACCGCTGAGCAATAAC                                         |
| CKG-450 | PCR-amplify <i>tifA<sub>RB69</sub></i> for construction of pACYC- <i>tifA<sub>RB69</sub></i> (forward)            | GTTTAACTTTAATAAGGAGATATACCATGTATTCAA<br>CTGTGTTTAAACCATCAACATACG |
| CKG-451 | PCR-amplify <i>tifA<sub>RB69</sub></i> for construction of pACYC- <i>tifA<sub>RB69</sub></i> (reverse)            | CGGTGGCAGCAGCCTAGGTTAATCATTTTAACTTTT<br>GCGAAATTTGCGTTTTTCTTGAC  |
| CKG-423 | Linearize pACYC for construction of pACYC- <i>tifA<sub>RB69</sub></i> (forward)                                   | GGTATATCTCCTTATTAAAGTTAAACAAAATTATTC<br>TACAGGGAATTG             |
| CKG-424 | Linearize pACYC for construction of pACYC- <i>tifA<sub>RB69</sub></i> (reverse)                                   | GGTATATCTCCTTATTAAAGTTAAACAAAATTATTC<br>TACAGGGAATTG             |
| CKG-460 | PCR-amplify <i>toxI</i> for construction of pACYCDuet-1- <i>toxI-tifA<sub>RB69</sub></i> (reverse)                | TTACTTTCTGTTGACTTAAGCATTACATTTTCTCG<br>TAAAAAAGGCGACTGTGTATAG    |
| CKG-444 | Linearize pACYCDuet-1 for construction of pACYCDuet-1- <i>toxI-tifA<sub>RB69</sub></i> (reverse)                  | TAATGCTTAAGTCGAACAGAAAGTAATCGTATTGTA<br>CAC                      |
| CKG-458 | PCR-amplify <i>tifA<sub>RB69</sub></i> for construction of pACYCDuet-1- <i>toxI-tifA<sub>RB69</sub></i> (forward) | AGAGAGCATATGTATTCAACTGTGTTTAAACCATCA<br>ACATACGAATTTGC           |
| CKG-459 | PCR-amplify <i>tifA<sub>RB69</sub></i> for construction of pACYCDuet-1- <i>toxI-tifA<sub>RB69</sub></i> (reverse) | AGAGAGCCTAGGTTAATTATTTTAACTTTTGC<br>GAAATTTGCGTTTTTCTTGACG       |

|         |                                                                                                                            |                                                                                          |
|---------|----------------------------------------------------------------------------------------------------------------------------|------------------------------------------------------------------------------------------|
| CKG-465 | PCR-amplify <i>tifA<sub>RB69</sub></i> for construction of pET- <i>tifA<sub>RB69</sub></i> -MBP-His <sub>6</sub> (forward) | TTTAAGAAGGAGATATAGTTCATGTATTCAACTGTG<br>TTTAAACCATCAACATACGAATTT                         |
| CKG-466 | PCR-amplify <i>tifA<sub>RB69</sub></i> for construction of pET- <i>tifA<sub>RB69</sub></i> -MBP-His <sub>6</sub> (reverse) | GGATTGGAAGTAGAGGTTCTCTTTTAAACTTTTGCGA<br>AATTTGCGTTTTTCTTGACG                            |
| CKG-441 | Construct pACYC- <i>tifA<sub>RB69</sub></i> -FLAG and pEXT20- <i>tifA<sub>RB69</sub></i> -FLAG (reverse)                   | CTACTTGTGCATCGTCGTCCTTGTAGTCGCTTCCGCTT<br>CCTTTTAAACTTTTGCGAAATTTGCGTTTTTCTTGAC<br>GAATC |
| CKG-575 | Construct pACYC- <i>tifA<sub>RB69</sub></i> -FLAG (forward)                                                                | TAATTAACCTAGGCTGCTGCCACCGCTG                                                             |
| CKG-656 | Construct pACYC- <i>toxI-tifA<sub>RB69</sub></i> (K55A R56A R59A) (forward)                                                | GCGGCGCAGATTGCGCAAGAAAAACGCAAATTTTCGC<br>AAAAGTTTAA                                      |
| CKG-657 | Construct pACYC- <i>toxI-tifA<sub>RB69</sub></i> (K55A R56A R59A) (reverse)                                                | AGTCGGACGTACAGCAAATTTAACGAAG                                                             |
| CKG-303 | Construct pBR322- <i>toxI-toxN</i> (K55A)-His <sub>6</sub> (forward)                                                       | CATCATCACCATCACCATTAACCATTCTTTTTTATGG<br>AATTGAAGGTCCAAAATC                              |
| CKG-304 | Construct pBR322- <i>toxI-toxN</i> (K55A)-His <sub>6</sub> (forward)                                                       | GCTTCCGCTTCCATCGTCTATTTT                                                                 |
| CKG-661 | Construct pBAD33- <i>toxN</i> -chitin binding domain (reverse)                                                             | CCTGCAGGTCGACTCATTGAAGCTGCCACAAGGCAG<br>G                                                |
| CKG-662 | Construct pBAD33- <i>toxN</i> -chitin binding domain (forward)                                                             | ATTCAGGAGGGATTGAGCTCATGAAATTTTACACAA<br>TATCAAGCAGTTACATAAAATACC                         |
| CKG-663 | PCR amplify MBP-His <sub>6</sub> for construction of pEXT20- <i>tifA<sub>RB69</sub></i> -MBP-His <sub>6</sub> (forward)    | AATTTTCGAAAAGTTTAAAAGAGAACCTCTACTTCC<br>AATCCGGCTCTAGC                                   |



|         |                                                                                                                                                                                      |                                                                                                          |
|---------|--------------------------------------------------------------------------------------------------------------------------------------------------------------------------------------|----------------------------------------------------------------------------------------------------------|
| CKG-664 | PCR amplify MBP-His <sub>6</sub> for construction of pEXT20- <i>tifA</i> <sub>RB69</sub> -MBP-His <sub>6</sub> (reverse)                                                             | GCATGCCTGCAGGTCGACCTAATGGTGATGGTGATG<br>GTGGCTACTG                                                       |
| CKG-624 | PCR amplify pEXT20- <i>tifA</i> <sub>RB69</sub> for construction of pEXT20- <i>tifA</i> <sub>RB69</sub> -MBP-His <sub>6</sub> (forward)                                              | GGATTGGAAGTAGAGGTTCTCTTTTAAACTTTTGCGA<br>AATTTGCGTTTTTCTTG                                               |
| CKG-665 | PCR amplify pEXT20- <i>tifA</i> <sub>RB69</sub> for construction of pEXT20- <i>tifA</i> <sub>RB69</sub> -MBP-His <sub>6</sub> and EXT20- <i>tifA</i> <sub>RB69</sub> -FLAG (reverse) | TAGGTCGACCTGCAGGCATGCAAG                                                                                 |
| CKG-666 | Construct pEXT20- <i>tifA</i> <sub>vB_PatP_CB4</sub> -FLAG and pEXT20- <i>tifA</i> <sub>vB_EcoM_005</sub> -FLAG, forward                                                             | GGAAGCGGAAGCGACTACAAGGACGACGATGACAA<br>GTAGTAGGTCGACCTGCAGGCATG                                          |
| CKG-670 | Construct pEXT20- <i>tifA</i> <sub>vB_EcoM_005</sub> -FLAG, reverse                                                                                                                  | GAGCCCGTACACATTGCACTCATATTG                                                                              |
| CKG-672 | Construct pEXT20- <i>tifA</i> <sub>vB_PatP_CB4</sub> -FLAG, reverse                                                                                                                  | GAGGTAATGTGAGTAGTCAGCCATAAACTGAGC                                                                        |
| CKG-658 | 15-nucleotide 56FAM-labeled RNA oligo derived from <i>artJ</i> sequence for fluorescence polarization experiments                                                                    | 56FAM/rCrArCrCrArGrArArArUrArUrArUrU                                                                     |
| CKG-659 | 30-nucleotide 56FAM-labeled RNA oligo derived from <i>artJ</i> sequence for fluorescence polarization experiments                                                                    | 56FAM/rUrArCrUrArCrGrCrArCrCrArGrArArArUrArUrAr<br>UrUrCrArGrGrArUrCrA                                   |
| CKG-660 | 45-nucleotide 56FAM-labeled RNA oligo derived from <i>artJ</i> sequence for fluorescence polarization experiments                                                                    | 56FAM/rArArArArCrGrGrUrArCrUrArCrGrCrArCrCrArGr<br>ArArArUrArUrArUrUrCrArGrGrArUrCrArGrCrArCrCrCrG<br>rG |

|         |                                                                                                                   |                                                                                                  |
|---------|-------------------------------------------------------------------------------------------------------------------|--------------------------------------------------------------------------------------------------|
| CKG-674 | 30-nucleotide 56FAM-labeled DNA oligo derived from <i>artJ</i> sequence for fluorescence polarization experiments | 56FAM/TACTACGCACCAGAAATATATTCAGGATCA                                                             |
| CKG-675 | 45-nucleotide 56FAM-labeled DNA oligo derived from <i>artJ</i> sequence for fluorescence polarization experiments | 56FAM/AAAACGGTACTACGCACCAGAAATATATTCAGGATCAGCACCCGG                                              |
| CKG-676 | 45-nucleotide 56FAM-labeled RNA oligo derived from <i>rrsA</i> sequence for fluorescence polarization experiments | 56FAM/rCrUrGrUrCrGrUrCrArGrCrUrCrGrUrGrUrUrGrUrGrArArArUrGrUrUrGrGrGrUrUrArArGrUrCrCrCrGrCrArArC |
| CKG-677 | 45-nucleotide 56FAM-labeled RNA oligo derived from <i>rrsA</i> sequence for fluorescence polarization experiments | 56FAM/rArGrArArUrUrCrCrArGrGrUrGrUrArGrCrGrGrUrGrArArArUrGrCrGrUrArGrArGrArUrCrUrGrGrArGrGrArArU |
| CKG-678 | 45-nucleotide 56FAM-labeled RNA oligo derived from <i>rrsC</i> sequence for fluorescence polarization experiments | 56FAM/rArGrArUrGrArGrArArUrGrUrGrCrCrUrUrCrGrGrGrArArCrCrGrUrGrArGrArCrArGrGrUrGrCrUrGrCrArUrGrG |
| CKG-680 | 30-nucleotide DNA oligo complementary to CKG-674 for fluorescence polarization experiments                        | TGATCCTGAATATATTTCTGGTGCGTAGTA                                                                   |
| CKG-681 | 45-nucleotide DNA oligo complementary to CKG-675 for fluorescence polarization experiments                        | CCGGGTGCTGATCCTGAATATATTTCTGGTGCGTAGTACCGTTTT                                                    |
| oSS-219 | Construct pEXT20- <i>tifA<sub>PM2</sub></i> , forward                                                             | CACACAGGAAACAGAATTCGAGCTCATGAATATTTATATTATGTATTTAGATAG                                           |

|         |                                                                   |                                                               |
|---------|-------------------------------------------------------------------|---------------------------------------------------------------|
| oSS-220 | Construct pEXT20- <i>tifA</i> <sub>PM2</sub> , reverse            | GAAGCTTGCATGCCTGCAGGTCGACTTAATCTCTTTC<br>TAAGAGGGCCATC        |
| oSS-221 | Construct pEXT20- <i>tifA</i> <sub>vB_PatP_CB4</sub> ,<br>forward | CACACAGGAAACAGAATTCGAGCTCATGCGTACTAT<br>TAAAACCTCAGTTATG      |
| oSS-222 | Construct pEXT20- <i>tifA</i> <sub>vB_PatP_CB4</sub> ,<br>reverse | GAAGCTTGCATGCCTGCAGGTCGACTTAGAGGTAAT<br>GTGAGTAGTCAGC         |
| oSS-229 | Construct pEXT20- <i>tifA</i> <sub>EcS1</sub> , forward           | CACACAGGAAACAGAATTCGAGCTCATGAAACTTA<br>TATTCATTACTACCCAGG     |
| oSS-230 | Construct pEXT20- <i>tifA</i> <sub>EcS1</sub> , reverse           | GAAGCTTGCATGCCTGCAGGTCGACTCATAGGTCCT<br>CTTTTTCATATAATTC      |
| oSS-231 | Construct pEXT20- <i>tifA</i> <sub>vB_EcoM_005</sub> ,<br>forward | CACACAGGAAACAGAATTCGAGCTCATGTTTGTCTT<br>AACTCAATTCTCTAAAG     |
| oSS-232 | Construct pEXT20- <i>tifA</i> <sub>vB_EcoM_005</sub> ,<br>reverse | GAAGCTTGCATGCCTGCAGGTCGACTTAGAGCCCGT<br>ACACATTGCAC           |
| oSS-233 | Construct pEXT20- <i>tifA</i> <sub>vB_EcoM_VR7</sub> ,<br>forward | CACACAGGAAACAGAATTCGAGCTCATGATTATTCA<br>AATTATGAAACCCG        |
| oSS-234 | Construct pEXT20- <i>tifA</i> <sub>vB_EcoM_VR7</sub> ,<br>reverse | GAAGCTTGCATGCCTGCAGGTCGACTTATTTACTTT<br>AGCGTAATCTAAAGTCAC    |
| oSS-235 | Construct pEXT20- <i>tifA</i> <sub>JS98</sub> , forward           | CACACAGGAAACAGAATTCGAGCTCATGAATATCGT<br>ACTAATGAAACCAAC       |
| oSS-236 | Construct pEXT20- <i>tifA</i> <sub>JS98</sub> , reverse           | GAAGCTTGCATGCCTGCAGGTCGACTTATTTTAACG<br>AATCTTCCAAATAAATTTTAC |

**Table S6. G-blocks**

| Number   | Purpose                                    | Sequence (5'→3')                                                                                                                                                                                                                                                                                                                                                                                                                                                                                                                                                                                                                                                                                                                                                         |
|----------|--------------------------------------------|--------------------------------------------------------------------------------------------------------------------------------------------------------------------------------------------------------------------------------------------------------------------------------------------------------------------------------------------------------------------------------------------------------------------------------------------------------------------------------------------------------------------------------------------------------------------------------------------------------------------------------------------------------------------------------------------------------------------------------------------------------------------------|
| gbCKG-4  | Construct pBAD33- <i>toxN<sub>Pa</sub></i> | GCACAACAACAGTTGCTAGTTCGCTAGTTGTAAGCC<br>TAACCGAAGTTCAGGTGATTTGCTACCTTTAAGTGC<br>AGCTAGAAATTCAGGTGATTTACTACCTTTAAGTAA<br>TAAAGTAAAAGAGGGCGACTACATAGTCGCCTTTTTT<br>ACGAGAAAAATATGAAATTCTACACTATATCAAGCA<br>AATACATTGAATATCTAAAGGAATTTGACGACAAGG<br>TTCCAATAGCGAAGATCCTACCTACCAAAAATCCTA<br>AGGCTTTCATTGGCATAGTATTAGAGATCCAGGGAC<br>ATAAGTATCTAGCCCCTCTGACATCCCCAAAAAAGT<br>GGCATAATAATGTTAAAGAGTCATCTCTTAGCTGCTT<br>TAAGCTCCATGAAAACGGCGTGCCCGAAAATCAGCT<br>TGGATTGATTAACCTGAAGTTCATGATTCCAATAATC<br>GAAGCTGAAGTGTCTTACTTGATTTGGGCAACATG<br>CCTAATACCCCTTACAAGAGAATGCTCTATAAGCAG<br>CTCCAGTTTATTCGTGCAAATTCTGATAAAATAGCTT<br>CAAAATCAGATACTTTACGAAACCTCGTATTACAAG<br>GAAAAATGCAAGGAACATGTAATTTTTCCCTGTTAG<br>AAGAAAAATATCGAGATTTTCGGTAAAGAAGCTGAG<br>GATACGGAAGAAGGCGAGTAA |
| gbCKG-13 | Construct pBAD33- <i>toxN<sub>Kp</sub></i> | CCCGTTTTTTTGGGCTAGCGAATTCGAGCTCATGAAG<br>TTTTACACGATTAGTTCTCGTTATATTGAATATCTGA<br>AGGGCTTCGAGGACAAAGTACCTAATAGCGAAGATC<br>CCACTTACCAAAAATCCAAAAGCGTTTATCGGAATTG<br>TTTTGGAGATCCAGGGTCATAAATATCTGGCTCCGCT<br>GACCTCACCGAAGCCGTGGCACTCTACCATTAAGGA<br>GTCCAGTCCATCCTTTTTTAAGTTACACGAAAACGGC<br>GTGCCCGAAAATCAGTTAGGACTTATCAATTTGAAA<br>TTTATGATCCCAATCATTGAAGCCGAAGTAAGTTTGT<br>TGGATTTGAACGGCATGCCTAATACGAGCTATAAAC<br>GTATGTTGTACAAACAACACTGCAGTTTATTCGTGTAA<br>ACTCGGACAAAATTGCAGAAAAATCAGAGCTGTTGC<br>GTAATCTTGTGTTGCAAGGGAAAATGCAAGGGACTT<br>GTAATTTCTCGTTGTTAGAGGAAAAGTACCGCGACT                                                                                                                                                                                     |

|          |                                             |                                                                                                                                                                                                                                                                                                                                                                                                                                                                                                                                                                                                                                                              |
|----------|---------------------------------------------|--------------------------------------------------------------------------------------------------------------------------------------------------------------------------------------------------------------------------------------------------------------------------------------------------------------------------------------------------------------------------------------------------------------------------------------------------------------------------------------------------------------------------------------------------------------------------------------------------------------------------------------------------------------|
|          |                                             | TCGGGAAGGAGGCCAATGACATGGAGGAGGGCGAG<br>TAAGTCGACCTGCAGGCATGCAAGCTTGGCTGTTTT<br>G                                                                                                                                                                                                                                                                                                                                                                                                                                                                                                                                                                             |
| gbCKG-14 | Construct pBAD33- <i>tenpN<sub>Ec</sub></i> | CCCGTTTTTTTGGGCTAGCGAATTCGAGCTCATGAGC<br>AAACAGGATTACATACAGTTAAGAACCCTTACAGAC<br>CAGTTTTATGCTGATAACAAAGGCCTACAAGAGGCT<br>CTCGACGGCAGTAATGATGGAAAAGTAAGAGGCTA<br>CGGAATCGTAGTTATTGATCTCAACGGATTGGTGTC<br>GGGATACCCTTACGAAGCCATTTAAACCATAAATTT<br>GGATTGTTTTCGGAGCGATCAGAAGGTGTTAAGAAA<br>GGACTGGATTACACCAAAGCGTTGCTAATTAAGAAA<br>GAAGAGTATGTATCGCGAGCCTATAAGATACCAACT<br>CCTGAATTTACCCATATCAATGATAACAAAGAAAAA<br>ATACAAGAAGATTTCAACAAATTCGTAAACAGATAC<br>ATAGAAGCGAACGTCAAGAAAGATGAAAACATACT<br>CAGAACTATCGTTACTCTACGCTGAAAACTATCA<br>CAAAGAATTAGGTTTAGAAGACTAAGTCGACCTGCA<br>GGCATGCAAGCTTGGCTGTTTTG                                                         |
| gbCKG-18 | Construct pBAD33- <i>toxN<sub>Ss</sub></i>  | CCCGTTTTTTTGGGCTAGCGAATTCGAGCTCATGAAA<br>TTTTATACGATTTCCAGTTCCTACATTAATATCTGA<br>AAGACTTTGACGACAAAGTACCCAATTCAGAGGATC<br>CTACCTACAATAATCCTAAGGCTTTTATCGGAATTGT<br>CTTAGAAATTGAAGGCCACAAATATTTGGCTCCCCT<br>GACAAGCCCTAAGGCTTGGCACGCAAACATCAAGG<br>AGTCGAGCCCGGCCTTTTTCAAGCTGCATGAAAATG<br>GGGTTCCCGACAATCAACTTGGGCTGATTAAGTTGA<br>AATTTATGATTCCCATCATTGAAGCCGAGGTCTCTCT<br>GTTAGACCTTGACAGCATGCCCACACGCCATATAA<br>ACGTATGCTGTATAAACAATTGCAATTTATCCGCGTT<br>AATGAGGATAAGATCTCGGAAAAGTCCAAGTTACTG<br>CGTAACCTGGCCTTACAGGGCGTATGCAGGGCACA<br>TGCGATTTTTCTGTGCTTGAGGAGAAGTACCAACATT<br>TTGGCAAGAACTGAAGATATGGAGATTGATGACT<br>AAGTCGACCTGCAGGCATGCAAGCTTGGCTGTTTTG |

|          |                                             |                                                                                                                                                                                                                                                                                                                                                                                                                                                                                                                                                                                                                                                                                                                                                          |
|----------|---------------------------------------------|----------------------------------------------------------------------------------------------------------------------------------------------------------------------------------------------------------------------------------------------------------------------------------------------------------------------------------------------------------------------------------------------------------------------------------------------------------------------------------------------------------------------------------------------------------------------------------------------------------------------------------------------------------------------------------------------------------------------------------------------------------|
| gbCKG-22 | Construct pBAD33- <i>toxN<sub>Vk</sub></i>  | CCCGTTTTTTTGGGCTAGCGAATTCGAGCTCATGAAG<br>TTTTACGTCGTCTCGAACGATTACATTAACCATTTGA<br>AGAAAGTAGACGCTCGCGTTCCTGATAATTATGATG<br>AACGCCGCGCATATGTAGGCGTCGTGATGGAGGTTT<br>GTGGGATTAATATCTGGTGCCTTTGACAAGCCATA<br>AAACAAAACACAAAGATATTAACCAGGTGCACAG<br>ACCGTATTTAAAATTCACGAATTGAATAACGAAGCG<br>AATCCCCTTGGTATGGCACAAATTAGCAATATGCTG<br>CCAGTTTTGGACTCTGAAATCCAGTACTGGATATG<br>AAGGTACAGTCCGAAAATAAGAAGAAGCTGCTTAA<br>CTTACAGCAGCAGTTCTTACGTAAAACTCGGAACG<br>TTTTGTCAAGAAAGCAATGCGTCTTTACGAATTGGT<br>AACGGTCAAGAAGGTGCCCGGTTTGGTTAAAATTG<br>TTGTGACTTTAAAGCGCTTGAAGCCGCCGCGCTGC<br>TTACATTCCGGCAAACCAGCGTCAGGCCTCTAGTGA<br>AGGTTTAGCGGCCCTTGCTGAGAAGTTAACAGTTA<br>AGTCGACCTGCAGGCATGCAAGCTTGGCTGTTTTG                                                             |
| gbCKG-25 | Construct pBAD33- <i>toxN<sub>Ser</sub></i> | CCCGTTTTTTTGGGCTAGCGAATTCGAGCTCATGAAG<br>TTCTATGTGATCGCAGATAGTTATATCAATCATTTGG<br>TTGCGTGCGATCAGCACGTTTATAAGAATAAGGGAA<br>CACGCCCTATATCGGTGTCGTCTGGAGGTTAATG<br>GTGTAGAATTTCTTGCACCGCTTACCTCTATAAAGA<br>GAAGCAAGACAAGATTCCCAATTCTTACCAGTTAAT<br>CTTTAAGATGTATGAGTTAGGTAATGAGGAGAACAA<br>ACTGGGCATGGTCCAAGTCAACAACATGGTACCCGT<br>ACTGAGCAGTGAGGTTGAACTTCTTGATTTGTCTACT<br>CAAGACGCCAAATACCAAAAATTTGTTAAACATGCAG<br>CAACAGTTCCTTCGTAAAAATCAGGAGGAACCTCAA<br>AAGAAGGCCTCTAAATTGTATAAGATCGTCAGTCAA<br>GGCGTAGCGACCGGGATTGTTAATGTCTGCTGCGAC<br>TTTAAGGCGTTGGAGGCCGAATGAAGACTTACGTT<br>CCGCCTGTCGCACAGGAGTCTGCTGTACCCACTGTA<br>GCGCAAGAAGCATCCAGCGAACCTCAGTCAGACCTG<br>CAAGATAAACTGTCCGCTCTGTGTGGTAAGTACAGT<br>AAGCGTTAAGTCGACCTGCAGGCATGCAAGCTTGGC<br>TGTTTTG |

|         |                                                     |                                                                                                                                                                                                                                                                                                                                              |
|---------|-----------------------------------------------------|----------------------------------------------------------------------------------------------------------------------------------------------------------------------------------------------------------------------------------------------------------------------------------------------------------------------------------------------|
| gbSS005 | Construct pEXT20- <i>tifA<sub>PM2</sub></i>         | CTAGGTTTCTCCATACAGGAGGTACCCATGAATATTT<br>ATATTATGTATTTAGATAGACCACACAGACCGCCCT<br>ATAAAAGTAATATGGGTTGGCAGGTTTATATTGAAA<br>CTCCTTGTAGTGATAGTTTGCCGTGGGGTTTAGTTGA<br>TGTGTTTAATTACTCTACAAAGCCAACAAAGAGGCA<br>AATTCGTAAGGCTAAAAAGGCTTTTTATAAAAATAT<br>AAAAAGCGAAATAGAATCTAGAAAAATGATGATGG<br>CCCTCTTAGAAAGAGATTAAGGGGATCCTCTAGAGT<br>CGACCTGCAGG |
| gbSS007 | Construct pEXT20- <i>tifA<sub>EcS1</sub></i>        | ACCTAGGTTTCTCCATACAGGAGGTACCCATGAAAA<br>CTTATATTCATTACTIONACCAGGCTTTGTATACGCAA<br>AGGCACTAAAGCCGAGTATAGTTTCAAAGCCTCCTT<br>TGAACTCATTATTGACCAAGATGCATCTGATAAGTT<br>ACGATTCGGTTGTGTTTCAGCTAAAGTTTTTGTAACT<br>CGCCCGTCCAAACGTCAAATTCGTTCGTCACAAAA<br>GAATTCGTAAAGAAATGAAAGCTCTTGAATTATAT<br>GAAAAAGAGGACCTATGAGGGGATCCTCTAGAGTC<br>GACCTGCAGGC  |
| gbSS010 | Construct pEXT20- <i>tifA<sub>vB_EcoM_005</sub></i> | GATACTGAGCACCTAGGTTTCTCCATACAGGAGGTA<br>CCCATGTTTGTCTTAACTCAATTCTCTAAAGCAGTGT<br>ATAGTTACTCTTGTCAATGGGAAGTCTTTATCGATTC<br>TCCTTACCTAAGTACGGTGTTTTTGGACGAGTAACT<br>ACTCAAGCTTATGTTGCACGGCCTACTAAGCGTCAG<br>ATTCGTAAACTTAAAAAGGCTCATCGCCAAGTATT<br>AAAAGAAGGGAACAATATGAGTGCAATGTGTACGG<br>GCTCTAAGGGGATCCTCTAGAGTCGACCTGCAGGCA<br>TGCAAGCTTG   |
| gbSS011 | Construct pEXT20- <i>tifA<sub>vB_EcoM_VR7</sub></i> | AGGTTTCTCCATACAGGAGGTACCCATGATTATTCA<br>AATTATGAAACCCGTAAAAAGTGGTTTTTGGGACAA<br>GTCTTTTGGTAAGCACAAGTTTTATGCAGACCGCGT<br>AAACAGTCGTTGGGAAGTTATTATTTCTCAACAAAC<br>CAAGGGACAAATGGACTTTGTAGAATTCTATGAATT<br>TGATGTTTCGTCCAAGTAAAGCGTCAGATTCCGCAATG<br>CAAAAAGGCATTTTCGCGTGTATGTCCGTGCATCAGT<br>CCTCCGTCGTCAACGTCAATTGGCAATGGAACCGCA              |

|         |                                                     |                                                                                                                                                                                                                                                                                                                                                                                 |
|---------|-----------------------------------------------------|---------------------------------------------------------------------------------------------------------------------------------------------------------------------------------------------------------------------------------------------------------------------------------------------------------------------------------------------------------------------------------|
|         |                                                     | GTTAGTGACTTTAGATTACGCTAAAGTAAAATAAGG<br>GGATCCTCTAGAGTCGACCTGCA                                                                                                                                                                                                                                                                                                                 |
| gbSS012 | Construct pEXT20- <i>tifA</i> <sub>JS98</sub>       | CACCTAGGTTTCTCCATACAGGAGGTACCCATGAAT<br>ATCGTACTAATGAAACCAACTCCTAGTTCTTTTTGGA<br>ATAAATCTTTCGGTAAGCATAATATGTTTATCCAACG<br>CACCGTAAGCAGCTGGGAAGTCTTTTCAGTAGG<br>TCATAACGATTATGAACAGGAATATGTAGAGTTCTT<br>CGAATTTCTGTGAAGCCTACTAAGCGTCAGATTCG<br>TCAGACCAAACGTAAATTCCGTAAAATTTATTTGGA<br>AGATTTCGTTAAAATAAGGGGATCCTCTAGAGTCGAC<br>CTGCAGGCAT                                       |
| gbSS015 | Construct pEXT20- <i>tifA</i> <sub>vB_Pat_CB4</sub> | AGGTTTCTCCATACAGGAGGTACCCATGCGTACTAT<br>TAAAACCTCAGTTATGTTCTTCCCTGCTGACCCTGTT<br>GTAGTTACCAAACCAAGCGTGATTGGATGTTAGCT<br>GATATGGCTAGTCCTGCTCAGTGGAGCATAGCAGTA<br>GATTTTATAGTTGATGCTAATCCCATGTCTGCATCCA<br>TACACCAGTATGCCTTTGTAGCTAAGCCTACATCTAA<br>ACAGGTGCGCCAGTGTAAGCGTAAAGCTGTCATTGA<br>GCATGAACGTGAATTGGCTCAGTTTATGGCTGACTA<br>CTCACATTACCTCTAAGGGGATCCTCTAGAGTCGAC<br>CTGCA |
